# Supplementary material for: PSP-GNM: Predicting Protein Stability Changes upon Point Mutations with a Gaussian Network Model
Source: MDPI journal article supplement (doi:10.3390/ijms231810711), 2022-09-14
Supplement: s1 [file s1]

## **Supporting Information**

### **PSP-GNM: Predicting Protein Stability Changes upon Point Mutations with a Gaussian Network Model**

Sambit K. Mishra<sup>1,2</sup>

Cancer Genomics Research Laboratory, Frederick National Laboratory, Rockville, Maryland,  
USA<sup>1</sup>

Division of Cancer Epidemiology and Genetics, National Cancer Institute, Bethesda, Maryland,  
USA<sup>2</sup>

Corresponding Author: Sambit K. Mishra ([sambit.mishra@nih.gov](mailto:sambit.mishra@nih.gov))

## Figures

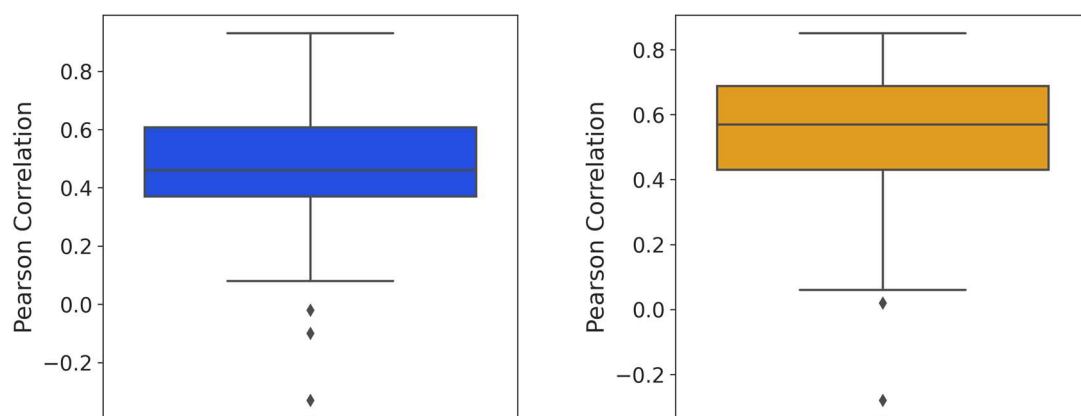

**Figure S1. Extent of agreement with experimental temperature factors for GNM and PSP-GNM.** Distribution of Pearson correlation between experimental B-factor and residue MSF calculated using PSP-GNM (left) and original GNM (right) is shown. The median correlation obtained for PSP-GNM is 0.46 while for GNM it is 0.57.

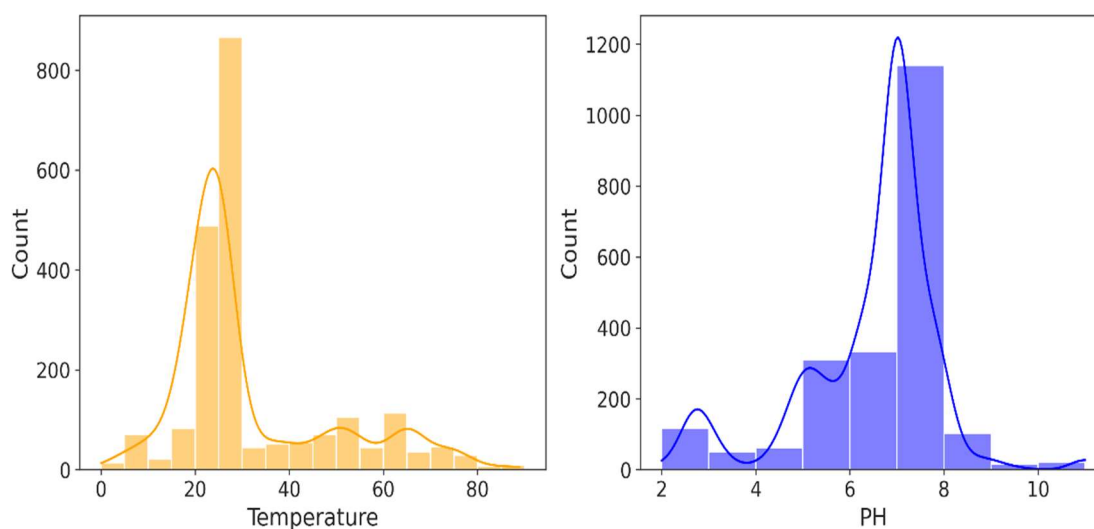

**Figure S2. Distribution of experimental temperature (°C) and pH for mutants in the S2298 dataset.** Mutants with a calculated  $\Delta\Delta G$  using PSP-GNM are probed for their temperature and pH distributions. The distribution for temperature shows a peak around 25°C and the pH around 7.

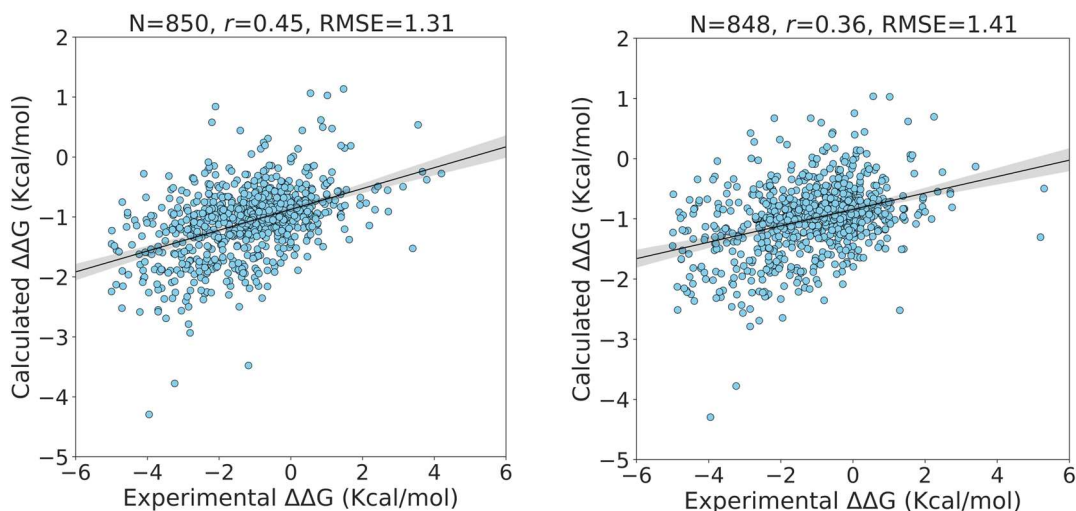

**Figure S3. Agreement with experimental  $\Delta\Delta G$  for temperature and pH ranges on the S2298 dataset.** Agreement between  $\Delta\Delta G$  from PSP-GNM and experimental measurements made at 24°C - 26°C but, varying ranges of pH (left), experimental measurements made at close to neutral pH (6.8 – 7.2) but varying ranges of temperature (right) in the S2298 dataset are shown. Only 2159 mutants with a calculated  $\Delta\Delta G$  out of the total 2298 are considered. Units for calculated  $\Delta\Delta G$  are in kcal/mol. The regression line of best fit and the 95% confidence interval (shaded gray) are shown.

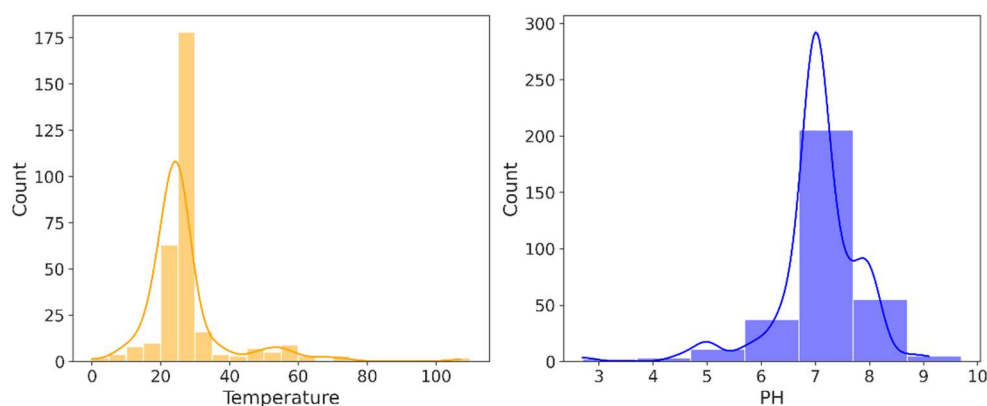

**Figure S4. Distribution of experimental temperature (°C) and pH for mutants in the S350 dataset.** Mutants with a PSP-GNM-calculated  $\Delta\Delta G$  are probed for their temperature and pH distributions. The distribution for temperature shows a peak around 25°C and the pH around 7.

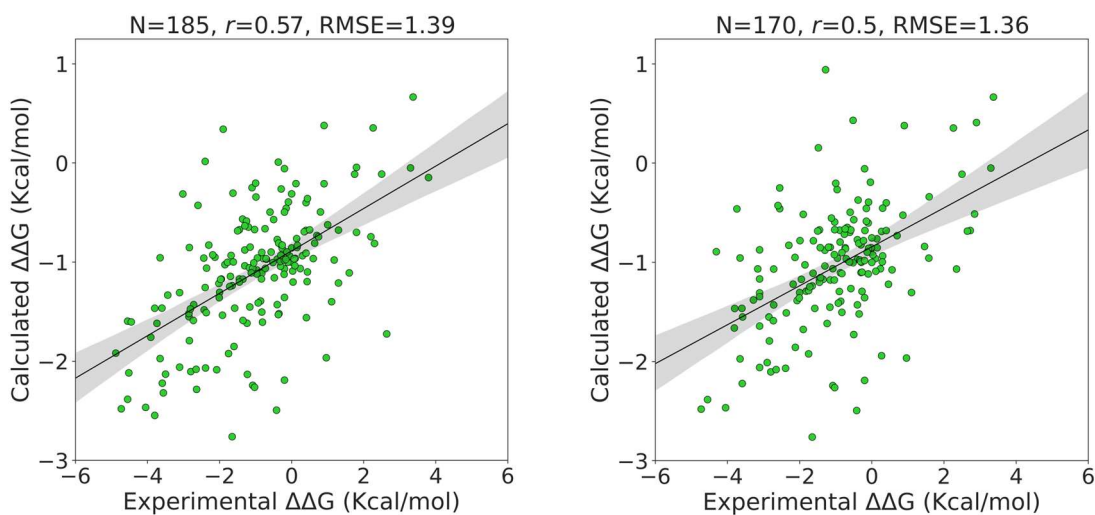

**Figure S5. Agreement with experimental  $\Delta\Delta G$  for temperature and pH ranges on the S350 dataset.** The extent of agreement between  $\Delta\Delta G$  from PSP-GNM and experimental measurements made at 24°C - 26°C but, varying ranges of pH (left), experimental measurements made at close to neutral pH (6.8 – 7.2) with varying ranges of temperature (right) for the S350 dataset. Units for calculated  $\Delta\Delta G$  are in Kcal/mol. The regression line of best fit and the 95% confidence interval (shaded gray) are shown.

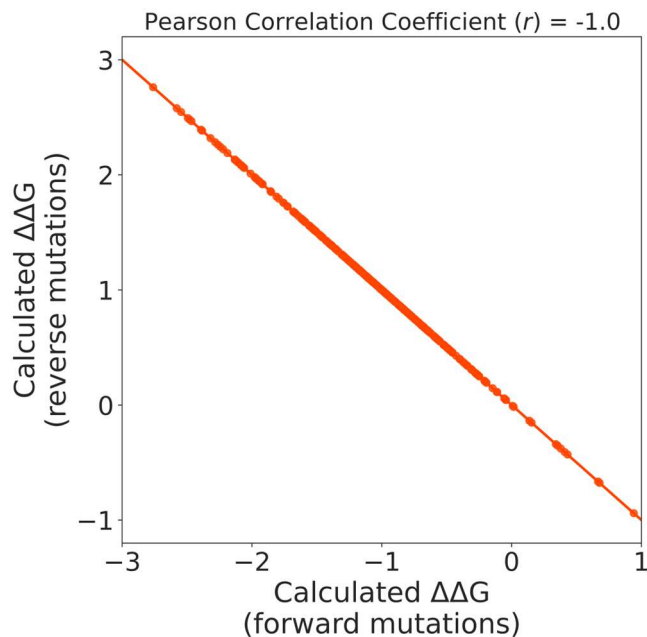

**Figure S6. Anti-symmetric behavior between forward and reverse mutations.** The PSP-GNM-calculated  $\Delta\Delta G$  for the forward and reverse mutations in the S350 dataset is shown. The regression plot demonstrates anti-symmetric behavior, as one would expect, between the  $\Delta\Delta G$  of the forward and reverse mutants. Shaded area in the plot corresponds to the 95% confidence interval. Units for the calculated  $\Delta\Delta G$  are in kcal/mol.

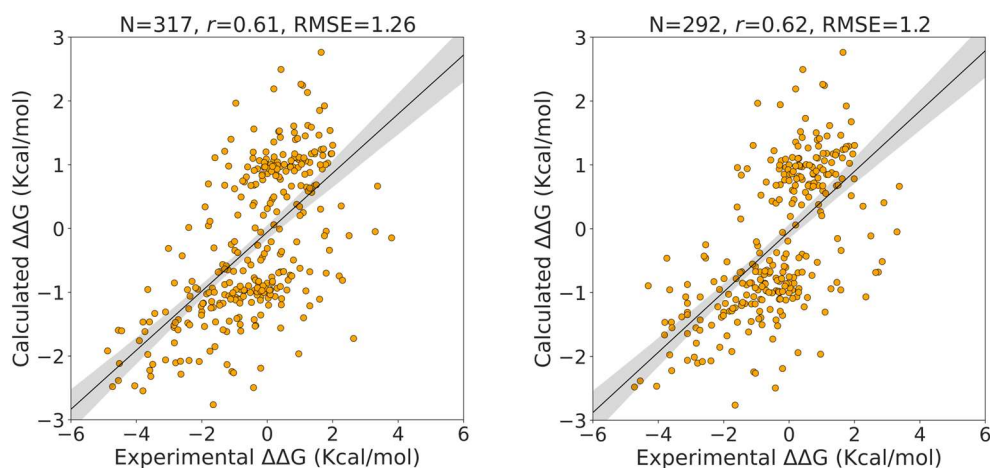

**Figure S7. Impact of experimental temperature and pH on PSP-GNM for the S611 dataset.** Agreement between  $\Delta\Delta G$  from PSP-GNM and experimental measurements made at 24°C - 26°C but, varying ranges of pH (left), experimental measurements made at close to neutral pH (6.8 – 7.2) but varying ranges of temperature (right) for the S611 dataset. Units for calculated  $\Delta\Delta G$  are in kcal/mol. The regression line of best fit and the 95% confidence interval (shaded gray) are shown.

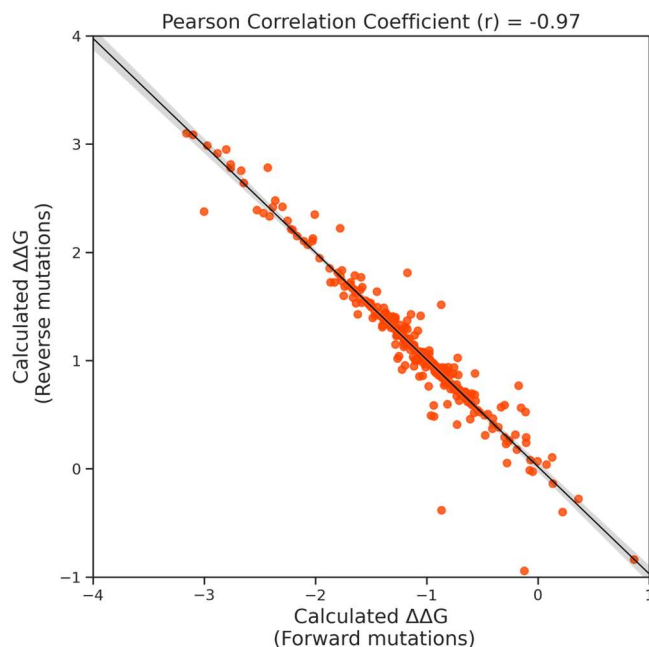

**Figure S8. Anti-symmetric behavior between forward and reverse mutations on Ssym+ dataset.** The PSP-GNM-calculated  $\Delta\Delta G$  for the forward and reverse mutations in the Ssym+ dataset is shown. Only 341 mutants in each category (forward and reverse) with a PSP-GNM calculated  $\Delta\Delta G$  are considered. The regression plot demonstrates anti-symmetric behavior, as one would expect, between the  $\Delta\Delta G$  of the forward and reverse mutants. Shaded area in the plot corresponds to the 95% confidence interval. Units for the calculated  $\Delta\Delta G$  are in kcal/mol.

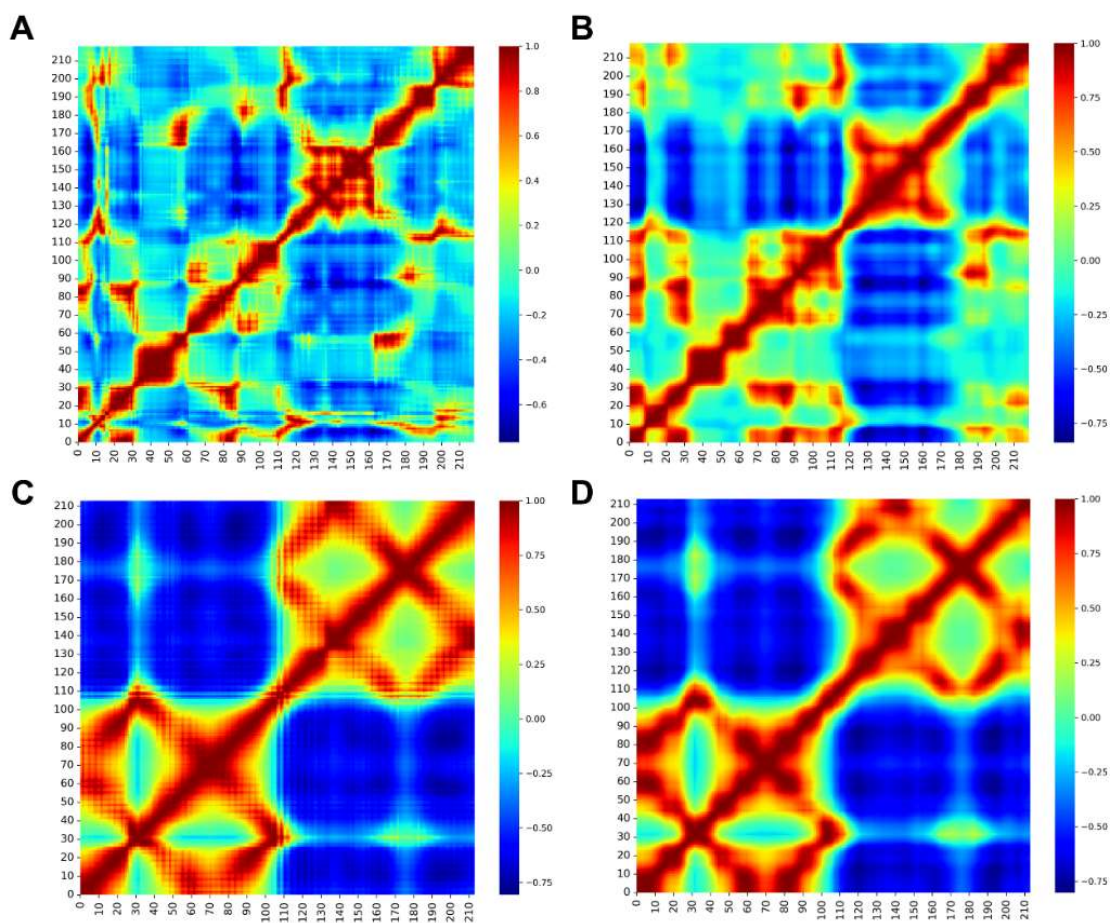

**Figure S9. Comparison of correlation maps between GNM and PSP-GNM.** Heatmaps of residue-residue fluctuation cross-correlations obtained for GNM (**A** and **C**) and PSP-GNM (**B** and **D**) are shown. The calculations are performed for the wildtype structures of two proteins: 1AKY (chain A) and 1CUN (chain A). The heat maps in the top row (**A** and **B**) are for 1AKY and the bottom row (**C** and **D**) are for 1CUN.

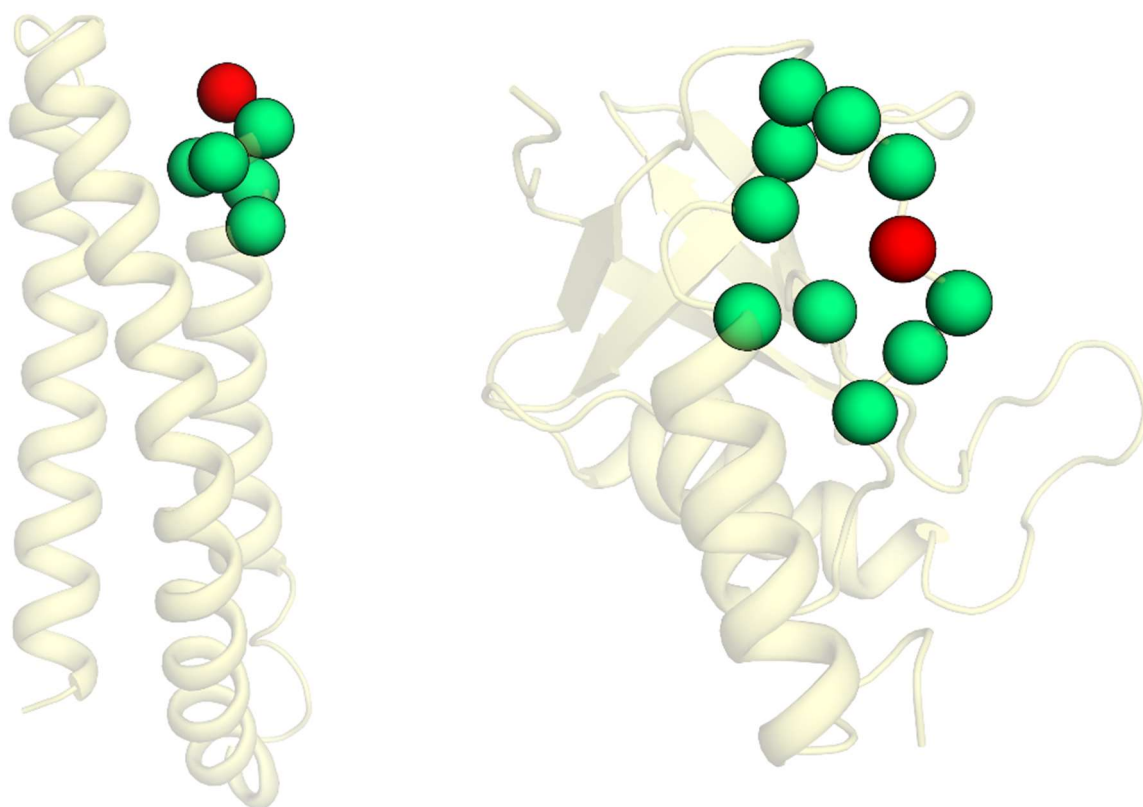

**Figure S10. Cases without calculated  $\Delta\Delta G$ .** The wildtype structures of two proteins and the location of mutation positions (red) and their contacts (green) are shown for 1AJ3, chain A, residue position 10, (left) and for 1EY0, chain A, residue position 114 (right).

## Tables

**Table S1.** Performance of PSP-GNM on the S350 dataset when using different statistical potentials.

| Potential Name                | AAindex Identifier | Number of Modes | Distance Cutoff (Å) | Pearson Correlation | RMSE (Kcal/mol) | Number of Predictions |
|-------------------------------|--------------------|-----------------|---------------------|---------------------|-----------------|-----------------------|
| Bastolla (BST)                | BASU010101         | 10              | 9                   | 0.34                | 1.519           | 215                   |
| Betancourt-Thirumalai (BT)    | BETM990101         | 10              | 9                   | 0.35                | 1.519           | 228                   |
| <b>Miyazawa-Jernigan (MJ)</b> | <b>MIYS960101</b>  | <b>10</b>       | <b>9</b>            | <b>0.51</b>         | <b>1.361</b>    | <b>318</b>            |

**Table S2.** Performance comparison on the S669 dataset for all 669 mutations. Mutations without a PSP-GNM-calculated  $\Delta\Delta G$  are assigned a theoretical value of 0.

|                 | Forward             |                 | Reverse             |                 | Forward + Reverse   |                 | Bias/Antisymmetry |              |
|-----------------|---------------------|-----------------|---------------------|-----------------|---------------------|-----------------|-------------------|--------------|
| Method          | Pearson Correlation | RMSE (Kcal/mol) | Pearson Correlation | RMSE (Kcal/mol) | Pearson Correlation | RMSE (Kcal/mol) | Bias              | Antisymmetry |
| ACDC-NN         | 0.46                | 1.49            | 0.45                | 1.5             | 0.61                | 1.5             | -0.02             | -0.98        |
| INPS-Seq        | 0.43                | 1.52            | 0.43                | 1.53            | 0.61                | 1.52            | 0                 | -1           |
| PremPS          | 0.4                 | 1.51            | 0.42                | 1.5             | 0.61                | 1.51            | 0.09              | -0.82        |
| ACDC-NN-Seq     | 0.42                | 1.53            | 0.42                | 1.53            | 0.59                | 1.53            | 0                 | -1           |
| <b>PSP-GNM</b>  | <b>0.36</b>         | <b>1.53</b>     | <b>0.36</b>         | <b>1.53</b>     | <b>0.59</b>         | <b>1.53</b>     | <b>0</b>          | <b>-1</b>    |
| DDGun3D         | 0.43                | 1.6             | 0.41                | 1.62            | 0.57                | 1.61            | -0.05             | -0.96        |
| DDGun           | 0.4                 | 1.72            | 0.39                | 1.75            | 0.57                | 1.74            | -0.05             | -0.96        |
| INPS3D          | 0.43                | 1.5             | 0.33                | 1.76            | 0.55                | 1.64            | -0.37             | -0.5         |
| ThermoNet       | 0.39                | 1.62            | 0.38                | 1.66            | 0.51                | 1.64            | -0.05             | -0.85        |
| Dynamut         | 0.41                | 1.6             | 0.34                | 1.69            | 0.5                 | 1.65            | -0.06             | -0.58        |
| PopMusic        | 0.42                | 1.51            | 0.24                | 2.09            | 0.46                | 1.82            | -0.69             | -0.31        |
| MAESTRO         | 0.5                 | 1.44            | 0.2                 | 2.1             | 0.44                | 1.8             | -0.57             | -0.22        |
| DUET            | 0.41                | 1.52            | 0.23                | 2.14            | 0.41                | 1.86            | -0.67             | -0.12        |
| mCSM            | 0.36                | 1.54            | 0.22                | 2.3             | 0.37                | 1.96            | -0.85             | -0.05        |
| I-Mutant3.0-Seq | 0.34                | 1.56            | 0.21                | 2.23            | 0.36                | 1.92            | -0.75             | -0.46        |
| Dynamut2        | 0.34                | 1.58            | 0.17                | 2.16            | 0.36                | 1.9             | -0.64             | 0.03         |
| MuPro           | 0.25                | 1.61            | 0.2                 | 2.38            | 0.32                | 2.03            | -0.95             | -0.32        |

|             | Forward             |                 | Reverse             |                 | Forward + Reverse   |                 | Bias/Antisymmetry |              |
|-------------|---------------------|-----------------|---------------------|-----------------|---------------------|-----------------|-------------------|--------------|
| Method      | Pearson Correlation | RMSE (Kcal/mol) | Pearson Correlation | RMSE (Kcal/mol) | Pearson Correlation | RMSE (Kcal/mol) | Bias              | Antisymmetry |
| I-Mutant3.0 | 0.36                | 1.53            | 0.14                | 2.32            | 0.32                | 1.97            | -0.8              | -0.05        |
| SDM         | 0.41                | 1.67            | 0.13                | 2.16            | 0.32                | 1.93            | -0.4              | -0.4         |
| FoldX       | 0.21                | 2.31            | 0.21                | 2.48            | 0.3                 | 2.4             | -0.33             | -0.2         |
| SAAFEC-Seq  | 0.36                | 1.53            | 0                   | 2.39            | 0.26                | 2.01            | -0.83             | -0.04        |

**Table S3.** Performance comparison on the S669 dataset for 117 mutations with a PSP-GNM calculated  $\Delta\Delta G$  and with experimental temperatures ranging from 24°C - 26°C and pH ranging from 6.8 - 7.2.

|                 | Forward             |                 | Reverse             |                 | Forward + Reverse   |                 | Bias/Antisymmetry |              |
|-----------------|---------------------|-----------------|---------------------|-----------------|---------------------|-----------------|-------------------|--------------|
| Method          | Pearson Correlation | RMSE (Kcal/mol) | Pearson Correlation | RMSE (Kcal/mol) | Pearson Correlation | RMSE (Kcal/mol) | Bias              | Antisymmetry |
| PremPS          | 0.52                | 1.44            | 0.47                | 1.48            | 0.63                | 1.46            | 0.14              | -0.82        |
| INPS-Seq        | 0.45                | 1.53            | 0.45                | 1.53            | 0.61                | 1.53            | -0.01             | -1           |
| ACDC-NN         | 0.43                | 1.52            | 0.41                | 1.54            | 0.58                | 1.53            | -0.02             | -0.99        |
| ThermoNet       | 0.43                | 1.56            | 0.5                 | 1.5             | 0.58                | 1.53            | -0.05             | -0.87        |
| ACDC-NN-Seq     | 0.4                 | 1.56            | 0.4                 | 1.56            | 0.57                | 1.56            | 0                 | -1           |
| DDGun3D         | 0.39                | 1.65            | 0.38                | 1.64            | 0.54                | 1.65            | -0.03             | -0.98        |
| INPS3D          | 0.53                | 1.45            | 0.24                | 1.84            | 0.54                | 1.65            | -0.47             | -0.5         |
| PopMusic        | 0.54                | 1.47            | 0.2                 | 2.13            | 0.53                | 1.83            | -0.9              | -0.49        |
| Dynamut         | 0.43                | 1.55            | 0.3                 | 1.67            | 0.51                | 1.61            | -0.02             | -0.58        |
| DDGun           | 0.32                | 1.83            | 0.33                | 1.87            | 0.5                 | 1.85            | -0.05             | -0.95        |
| <b>PSP-GNM</b>  | <b>0.23</b>         | <b>1.64</b>     | <b>0.23</b>         | <b>1.64</b>     | <b>0.5</b>          | <b>1.64</b>     | <b>0</b>          | <b>-1</b>    |
| DUET            | 0.6                 | 1.37            | 0.13                | 2.23            | 0.48                | 1.85            | -0.85             | -0.25        |
| MAESTRO         | 0.55                | 1.44            | 0.11                | 2.2             | 0.46                | 1.86            | -0.8              | -0.25        |
| mCSM            | 0.58                | 1.4             | 0.16                | 2.37            | 0.46                | 1.95            | -1.01             | -0.23        |
| FoldX           | 0.44                | 2.15            | 0.18                | 2.21            | 0.45                | 2.18            | -0.41             | -0.37        |
| SAAFEC-Seq      | 0.46                | 1.51            | 0.12                | 2.31            | 0.43                | 1.95            | -0.96             | -0.29        |
| Dynamut2        | 0.34                | 1.58            | 0.17                | 2.16            | 0.36                | 1.9             | -0.64             | 0.03         |
| I-Mutant3.0-Seq | 0.34                | 1.61            | 0.04                | 2.27            | 0.34                | 1.96            | -0.86             | -0.37        |
| SDM             | 0.47                | 1.59            | -0.07               | 2.28            | 0.32                | 1.97            | -0.54             | -0.36        |
| I-Mutant3.0     | 0.46                | 1.51            | -0.09               | 2.49            | 0.31                | 2.06            | -1.03             | -0.17        |
| MuPro           | 0.12                | 1.75            | -0.01               | 2.38            | 0.2                 | 2.09            | -0.98             | -0.37        |

**Table S4.** Performance comparison on the Ssym+ dataset for all the 352 mutations.

|                 | Forward             |                 | Reverse             |                 | Forward + Reverse   |                 | Bias/Antisymmetry |              |
|-----------------|---------------------|-----------------|---------------------|-----------------|---------------------|-----------------|-------------------|--------------|
| Method          | Pearson Correlation | RMSE (Kcal/mol) | Pearson Correlation | RMSE (Kcal/mol) | Pearson Correlation | RMSE (Kcal/mol) | Bias              | Antisymmetry |
| PremPS          | 0.81                | 1.05            | 0.73                | 1.21            | 0.84                | 1.14            | -0.02             | -0.93        |
| ACDC-NN         | 0.62                | 1.46            | 0.6                 | 1.51            | 0.7                 | 1.48            | -0.03             | -0.98        |
| ACDC-NN-Seq     | 0.6                 | 1.47            | 0.6                 | 1.47            | 0.69                | 1.47            | 0                 | -1           |
| DDGun3D         | 0.58                | 1.45            | 0.56                | 1.49            | 0.66                | 1.47            | -0.02             | -0.99        |
| DDGun           | 0.51                | 1.51            | 0.51                | 1.51            | 0.64                | 1.51            | -0.01             | -1           |
| INPS-Seq        | 0.5                 | 1.53            | 0.51                | 1.52            | 0.64                | 1.53            | 0                 | -0.99        |
| <b>PSP-GNM</b>  | <b>0.41</b>         | <b>1.5</b>      | <b>0.36</b>         | <b>1.53</b>     | <b>0.63</b>         | <b>1.52</b>     | <b>0</b>          | <b>-0.96</b> |
| INPS3D          | 0.62                | 1.31            | 0.32                | 2.01            | 0.58                | 1.69            | -0.51             | -0.52        |
| PoPMuSiC        | 0.65                | 1.27            | 0.28                | 2.25            | 0.53                | 1.83            | -0.72             | -0.3         |
| FoldX           | 0.57                | 1.94            | 0.41                | 2.2             | 0.51                | 2.07            | -0.58             | -0.26        |
| Dynamut         | 0.55                | 1.56            | 0.38                | 1.82            | 0.51                | 1.7             | -0.12             | -0.57        |
| ThermoNet       | 0.45                | 1.67            | 0.38                | 1.74            | 0.5                 | 1.7             | -0.02             | -0.89        |
| MUpro           | 0.76                | 1.06            | 0.1                 | 2.59            | 0.47                | 1.98            | -0.96             | -0.05        |
| DUET            | 0.63                | 1.29            | 0.2                 | 2.37            | 0.45                | 1.91            | -0.74             | -0.3         |
| MAESTRO         | 0.6                 | 1.37            | 0.25                | 2.27            | 0.44                | 1.87            | -0.63             | -0.32        |
| I-Mutant3.0-Seq | 0.59                | 1.37            | 0.11                | 2.31            | 0.42                | 1.9             | -0.65             | -0.34        |
| mCSM            | 0.61                | 1.31            | 0.16                | 2.52            | 0.41                | 2.01            | -0.91             | -0.27        |
| I-Mutant3.0     | 0.64                | 1.29            | -0.03               | 2.41            | 0.39                | 1.93            | -0.69             | 0.01         |
| Dynamut2        | 0.62                | 1.3             | 0.07                | 2.48            | 0.39                | 1.98            | -0.78             | -0.12        |
| SDM             | 0.51                | 1.62            | 0.2                 | 2.39            | 0.35                | 2.04            | -0.54             | -0.44        |
| SAAFEC-SEQ      | 0.71                | 1.16            | -0.39               | 2.83            | 0.26                | 2.17            | -0.97             | 0.66         |

**Table S5.** Extent of similarity between the S350 and S2298 datasets. For each protein in the S350 dataset, the protein with best sequence match in the S2298 dataset is reported. The best match was obtained by using the --subject\_besthit argument in BLASTp.

| Query* ID | Subject* ID | % Identity | Alignment Length | Query start | Query end           | Subject start | Subject end | E value   | Bit score | % Coverage |
|-----------|-------------|------------|------------------|-------------|---------------------|---------------|-------------|-----------|-----------|------------|
| 1AJ3A     | 1AJ3A       | 100        | 98               | 1           | 98                  | 1             | 98          | 4.68E-71  | 199       | 100        |
| 1AKYA     | 1AKYA       | 100        | 218              | 1           | 218                 | 1             | 218         | 7.32E-166 | 448       | 100        |
| 1AONU     | 1AONU       | 100        | 97               | 1           | 97                  | 1             | 97          | 6.76E-67  | 188       | 100        |
| 1APSA     | 1APSA       | 100        | 98               | 1           | 98                  | 1             | 98          | 7.15E-72  | 201       | 100        |
| 1BNIA     | 1BNIA       | 100        | 108              | 1           | 108                 | 1             | 108         | 1.87E-80  | 223       | 100        |
| 1BTAA     | 1BTAA       | 100        | 89               | 1           | 89                  | 1             | 89          | 3.85E-65  | 183       | 100        |
| 1BVCA     | 1BVCA       | 100        | 153              | 1           | 153                 | 1             | 153         | 8.15E-112 | 306       | 100        |
| 1C9OA     | 1C9OA       | 100        | 66               | 1           | 66                  | 1             | 66          | 1.11E-45  | 132       | 100        |
| 1CEYA     | 1CEYA       | 100        | 128              | 1           | 128                 | 1             | 128         | 7.53E-93  | 256       | 100        |
| 1CSEI     | 1CSEI       | 100        | 63               | 1           | 63                  | 1             | 63          | 1.75E-44  | 129       | 100        |
| 1CSPA     | 1CSPA       | 100        | 67               | 1           | 67                  | 1             | 67          | 5.52E-46  | 133       | 100        |
| 1CUNA     | 1CUNA       | 100        | 213              | 1           | 213                 | 1             | 213         | 9.82E-160 | 432       | 100        |
| 1DKTA     | 1DKTA       | 100        | 72               | 1           | 72                  | 1             | 72          | 1.13E-52  | 150       | 100        |
| 1E65A     | 1E65A       | 100        | 128              | 1           | 128                 | 1             | 128         | 2.06E-97  | 268       | 100        |
| 1EY0A     | 1EY0A       | 100        | 136              | 1           | 136                 | 1             | 136         | 8.64E-102 | 279       | 100        |
| 1FNAA     | 1FNAA       | 100        | 91               | 1           | 91                  | 1             | 91          | 9.41E-64  | 180       | 100        |
| 1FTGA     | 1FTGA       | 100        | 168              | 1           | 168                 | 1             | 168         | 1.45E-123 | 337       | 100        |
| 1G4IA     | 1G4IA       | 100        | 123              | 1           | 123                 | 1             | 123         | 6.15E-91  | 251       | 100        |
| 1H7MA     | 1H7MA       | 100        | 99               | 1           | 99                  | 1             | 99          | 4.56E-71  | 199       | 100        |
| 1HFZA     | 1HFZA       | 100        | 123              | 1           | 123                 | 1             | 123         | 6.06E-92  | 253       | 100        |
| 1HMEA     | 1HMEA       | 100        | 77               | 1           | 77                  | 1             | 77          | 3.97E-55  | 157       | 100        |
| 1HMKA     | 1HMKA       | 100        | 121              | 1           | 121                 | 1             | 121         | 2.38E-90  | 249       | 100        |
| 1HMSA     | 1HMSA       | 100        | 131              | 1           | 131                 | 1             | 131         | 1.01E-95  | 263       | 100        |
| 1IETA     |             |            |                  |             | No significant hits |               |             |           |           |            |
| 1IFCA     | 1IFCA       | 100        | 131              | 1           | 131                 | 1             | 131         | 2.46E-95  | 263       | 100        |
| 1IGVA     | 1IGVA       | 100        | 75               | 1           | 75                  | 1             | 75          | 9.97E-50  | 143       | 100        |
| 1IHBA     | 1IHBA       | 100        | 156              | 1           | 156                 | 1             | 156         | 3.78E-115 | 315       | 100        |
| 1IMQA     | 1IMQA       | 100        | 86               | 1           | 86                  | 1             | 86          | 3.07E-64  | 181       | 100        |
| 1IROA     |             |            |                  |             | No significant hits |               |             |           |           |            |
| 1JIWI     |             |            |                  |             | No significant hits |               |             |           |           |            |
| 1K9QA     | 1K9QA       | 100        | 40               | 1           | 40                  | 1             | 40          | 1.43E-28  | 87.4      | 100        |
| 1KFWA     |             |            |                  |             | No significant hits |               |             |           |           |            |
| 1LNIA     | 1LNIA       | 100        | 96               | 1           | 96                  | 1             | 96          | 1.88E-70  | 197       | 100        |

| Query* ID | Subject* ID | % Identity | Alignment Length | Query start | Query end           | Subject start | Subject end | E value   | Bit score | % Coverage |
|-----------|-------------|------------|------------------|-------------|---------------------|---------------|-------------|-----------|-----------|------------|
| 1LZ1A     | 1LZ1A       | 100        | 130              | 1           | 130                 | 1             | 130         | 1.65E-97  | 268       | 100        |
| 1MGRA     | 1MGRA       | 100        | 97               | 1           | 97                  | 1             | 97          | 6.85E-73  | 203       | 100        |
| 1MJCA     | 1MJCA       | 100        | 69               | 1           | 69                  | 1             | 69          | 2.08E-48  | 139       | 100        |
| 1MSIA     | 1MSIA       | 100        | 66               | 1           | 66                  | 1             | 66          | 1.32E-44  | 129       | 100        |
| 1OIAA     | 1OIAA       | 100        | 90               | 1           | 90                  | 1             | 90          | 1.85E-66  | 186       | 100        |
| 1P2PA     | 1P2PA       | 100        | 124              | 1           | 124                 | 1             | 124         | 4.74E-93  | 256       | 100        |
| 1QLPA     | 1QLPA       | 100        | 372              | 1           | 372                 | 1             | 372         | 0         | 759       | 100        |
| 1RG8A     | 1RG8A       | 100        | 141              | 1           | 141                 | 1             | 141         | 6.14E-108 | 295       | 100        |
| 1RISA     | 1RISA       | 100        | 97               | 1           | 97                  | 1             | 97          | 6.57E-69  | 193       | 100        |
| 1RN1C     | 1RN1C       | 100        | 104              | 1           | 104                 | 1             | 104         | 2.58E-76  | 213       | 100        |
| 1RTBA     | 1RTBA       | 100        | 124              | 1           | 124                 | 1             | 124         | 9.97E-94  | 258       | 100        |
| 1RTP1     |             |            |                  |             | No significant hits |               |             |           |           |            |
| 1SHFA     | 1SHFA       | 100        | 59               | 1           | 59                  | 1             | 59          | 1.65E-42  | 124       | 100        |
| 1TITA     | 1TITA       | 100        | 89               | 1           | 89                  | 1             | 89          | 1.00E-64  | 182       | 100        |
| 1TTQA     | 1TTQA       | 100        | 256              | 1           | 256                 | 1             | 256         | 0         | 518       | 100        |
| 1UZCA     | 1UZCA       | 100        | 69               | 1           | 69                  | 1             | 69          | 8.38E-48  | 138       | 100        |
| 1YYJA     | 1YYJA       | 100        | 106              | 1           | 106                 | 1             | 106         | 2.29E-76  | 213       | 100        |
| 1ZG4A     | 1ZG4A       | 100        | 263              | 1           | 263                 | 1             | 263         | 0         | 541       | 100        |
| 1ZNJB     | 1ZNJB       | 100        | 30               | 1           | 30                  | 1             | 30          | 3.84E-20  | 65.5      | 100        |
| 2A36A     | 2A36A       | 100        | 59               | 1           | 59                  | 1             | 59          | 2.51E-42  | 123       | 100        |
| 2DRIA     | 2DRIA       | 100        | 271              | 1           | 271                 | 1             | 271         | 0         | 537       | 100        |
| 2IMMA     | 2IMMA       | 100        | 114              | 1           | 114                 | 1             | 114         | 2.46E-85  | 236       | 100        |
| 2LZMA     | 2LZMA       | 100        | 164              | 1           | 164                 | 1             | 164         | 5.22E-125 | 340       | 100        |
| 2NVHA     | 2NVHA       | 100        | 152              | 1           | 152                 | 1             | 152         | 4.84E-115 | 314       | 100        |
| 2RN2A     | 2RN2A       | 100        | 155              | 1           | 155                 | 1             | 155         | 1.12E-119 | 326       | 100        |
| 2TRXA     | 2TRXA       | 100        | 108              | 1           | 108                 | 1             | 108         | 7.23E-79  | 219       | 100        |
| 3GLYA     | 3GLYA       | 100        | 470              | 1           | 470                 | 1             | 470         | 0         | 950       | 100        |
| 3MBPA     | 3MBPA       | 100        | 370              | 1           | 370                 | 1             | 370         | 0         | 748       | 100        |
| 3PGKA     | 3PGKA       | 100        | 415              | 1           | 415                 | 1             | 415         | 0         | 832       | 100        |
| 3SILA     | 3SILA       | 100        | 379              | 1           | 379                 | 1             | 379         | 0         | 783       | 100        |
| 4LYZA     | 4LYZA       | 100        | 129              | 1           | 129                 | 1             | 129         | 4.12E-96  | 265       | 100        |
| 5DFRA     | 5DFRA       | 100        | 154              | 1           | 154                 | 1             | 154         | 1.87E-117 | 320       | 100        |
| 5PTIA     | 5PTIA       | 100        | 58               | 1           | 58                  | 1             | 58          | 1.75E-41  | 121       | 100        |

\*Query ID: PDB ID + Chain ID for proteins in the S350 dataset

\*Subject ID: PDB ID + Chain ID for best hit in the S2298 dataset

**Table S6.** Extent of similarity between the S669 and S2298 datasets. For each protein in the S669 dataset, the protein with the best sequence match in the S2298 dataset is reported. The best match was obtained by using the --subject\_besthit argument in BLASTp.

| Query* ID | Subject* ID | % Identity | Alignment Length | Query start | Query end           | Subject start | Subject end | E value  | Bit score | % Coverage |
|-----------|-------------|------------|------------------|-------------|---------------------|---------------|-------------|----------|-----------|------------|
| 1A0FA     |             |            |                  |             | No significant hits |               |             |          |           |            |
| 1A7VA     |             |            |                  |             | No significant hits |               |             |          |           |            |
| 1BA3A     |             |            |                  |             | No significant hits |               |             |          |           |            |
| 1BFMA     |             |            |                  |             | No significant hits |               |             |          |           |            |
| 1BNLA     |             |            |                  |             | No significant hits |               |             |          |           |            |
| 1D5GA     |             |            |                  |             | No significant hits |               |             |          |           |            |
| 1DIVA     |             |            |                  |             | No significant hits |               |             |          |           |            |
| 1DXXA     |             |            |                  |             | No significant hits |               |             |          |           |            |
| 1EKGA     |             |            |                  |             | No significant hits |               |             |          |           |            |
| 1F8IA     |             |            |                  |             | No significant hits |               |             |          |           |            |
| 1FH5H     | 2IMMA       | 31.034     | 87               | 14          | 93                  | 21            | 97          | 0.000173 | 31.6      | 43.9       |
| 1FRDA     |             |            |                  |             | No significant hits |               |             |          |           |            |
| 1FT8A     |             |            |                  |             | No significant hits |               |             |          |           |            |
| 1FXAA     |             |            |                  |             | No significant hits |               |             |          |           |            |
| 1G3PA     |             |            |                  |             | No significant hits |               |             |          |           |            |
| 1GLUA     |             |            |                  |             | No significant hits |               |             |          |           |            |
| 1GUAB     |             |            |                  |             | No significant hits |               |             |          |           |            |
| 1GWYA     |             |            |                  |             | No significant hits |               |             |          |           |            |
| 1H0XA     |             |            |                  |             | No significant hits |               |             |          |           |            |
| 1HCQA     |             |            |                  |             | No significant hits |               |             |          |           |            |
| 1IOJA     |             |            |                  |             | No significant hits |               |             |          |           |            |
| 1IR3A     |             |            |                  |             | No significant hits |               |             |          |           |            |
| 1ITMA     |             |            |                  |             | No significant hits |               |             |          |           |            |
| 1IV7B     |             |            |                  |             | No significant hits |               |             |          |           |            |
| 1IV9A     |             |            |                  |             | No significant hits |               |             |          |           |            |
| 1J8IA     |             |            |                  |             | No significant hits |               |             |          |           |            |
| 1JL9A     |             |            |                  |             | No significant hits |               |             |          |           |            |
| 1JLVA     |             |            |                  |             | No significant hits |               |             |          |           |            |
| 1L6HA     |             |            |                  |             | No significant hits |               |             |          |           |            |
| 1LVMA     |             |            |                  |             | No significant hits |               |             |          |           |            |
| 1N18A     |             |            |                  |             | No significant hits |               |             |          |           |            |
| 1N88A     |             |            |                  |             | No significant hits |               |             |          |           |            |
| 1NM1A     |             |            |                  |             | No significant hits |               |             |          |           |            |
| 1O1UA     | 1HMSA       | 30.769     | 91               | 1           | 91                  | 3             | 92          | 2.81E-09 | 43.9      | 71.7       |
| 1O6XA     |             |            |                  |             | No significant hits |               |             |          |           |            |
| 1OSIA     |             |            |                  |             | No significant hits |               |             |          |           |            |
| 1PFLA     |             |            |                  |             | No significant hits |               |             |          |           |            |
| 1PREA     |             |            |                  |             | No significant hits |               |             |          |           |            |
| 1PRGA     |             |            |                  |             | No significant hits |               |             |          |           |            |
| 1R2YA     |             |            |                  |             | No significant hits |               |             |          |           |            |
| 1R6RA     |             |            |                  |             | No significant hits |               |             |          |           |            |
| 1SPDA     |             |            |                  |             | No significant hits |               |             |          |           |            |
| 1X0JA     |             |            |                  |             | No significant hits |               |             |          |           |            |
| 1XWSA     |             |            |                  |             | No significant hits |               |             |          |           |            |
| 1XXNA     |             |            |                  |             | No significant hits |               |             |          |           |            |
| 1XZOA     |             |            |                  |             | No significant hits |               |             |          |           |            |
| 2ARFA     |             |            |                  |             | No significant hits |               |             |          |           |            |

| Query* ID | Subject* ID | % Identity | Alignment Length | Query start | Query end           | Subject start | Subject end | E value  | Bit score | % Coverage |
|-----------|-------------|------------|------------------|-------------|---------------------|---------------|-------------|----------|-----------|------------|
| 2BJDA     | 1APSA       | 31.579     | 76               | 2           | 76                  | 6             | 81          | 1.16E-11 | 48.1      | 84.4       |
| 2C9QA     |             |            |                  |             | No significant hits |               |             |          |           |            |
| 2CLRB     |             |            |                  |             | No significant hits |               |             |          |           |            |
| 2DVVA     |             |            |                  |             | No significant hits |               |             |          |           |            |
| 2H3FA     |             |            |                  |             | No significant hits |               |             |          |           |            |
| 2HBBA     |             |            |                  |             | No significant hits |               |             |          |           |            |
| 2JIEA     |             |            |                  |             | No significant hits |               |             |          |           |            |
| 2JUCA     |             |            |                  |             | No significant hits |               |             |          |           |            |
| 2KJ3A     |             |            |                  |             | No significant hits |               |             |          |           |            |
| 2KS4A     |             |            |                  |             | No significant hits |               |             |          |           |            |
| 2LTBA     |             |            |                  |             | No significant hits |               |             |          |           |            |
| 2M5SA     |             |            |                  |             | No significant hits |               |             |          |           |            |
| 2MPCA     |             |            |                  |             | No significant hits |               |             |          |           |            |
| 2N7ZA     |             |            |                  |             | No significant hits |               |             |          |           |            |
| 2NTEA     |             |            |                  |             | No significant hits |               |             |          |           |            |
| 2OUOA     |             |            |                  |             | No significant hits |               |             |          |           |            |
| 2PR5A     |             |            |                  |             | No significant hits |               |             |          |           |            |
| 2PTLA     |             |            |                  |             | No significant hits |               |             |          |           |            |
| 2RPNA     | 2A36A       | 43.103     | 58               | 4           | 59                  | 3             | 57          | 2.49E-11 | 45.4      | 98.3       |
| 2VY0A     |             |            |                  |             | No significant hits |               |             |          |           |            |
| 2WQGA     |             |            |                  |             | No significant hits |               |             |          |           |            |
| 2ZTAA     |             |            |                  |             | No significant hits |               |             |          |           |            |
| 3BCIA     |             |            |                  |             | No significant hits |               |             |          |           |            |
| 3BN0A     |             |            |                  |             | No significant hits |               |             |          |           |            |
| 3C2IA     |             |            |                  |             | No significant hits |               |             |          |           |            |
| 3D2AA     |             |            |                  |             | No significant hits |               |             |          |           |            |
| 3D3BA     |             |            |                  |             | No significant hits |               |             |          |           |            |
| 3DV0I     |             |            |                  |             | No significant hits |               |             |          |           |            |
| 3ECUA     |             |            |                  |             | No significant hits |               |             |          |           |            |
| 3FISA     |             |            |                  |             | No significant hits |               |             |          |           |            |
| 3G1GA     |             |            |                  |             | No significant hits |               |             |          |           |            |
| 3K82A     |             |            |                  |             | No significant hits |               |             |          |           |            |
| 3L15B     |             |            |                  |             | No significant hits |               |             |          |           |            |
| 3MONB     |             |            |                  |             | No significant hits |               |             |          |           |            |
| 3O39A     |             |            |                  |             | No significant hits |               |             |          |           |            |
| 3S4MA     |             |            |                  |             | No significant hits |               |             |          |           |            |
| 3S92A     |             |            |                  |             | No significant hits |               |             |          |           |            |
| 4BJXA     |             |            |                  |             | No significant hits |               |             |          |           |            |
| 4BUQA     |             |            |                  |             | No significant hits |               |             |          |           |            |
| 4HE7A     |             |            |                  |             | No significant hits |               |             |          |           |            |
| 4N6V0     |             |            |                  |             | No significant hits |               |             |          |           |            |
| 4WAAA     |             |            |                  |             | No significant hits |               |             |          |           |            |
| 4YEEA     |             |            |                  |             | No significant hits |               |             |          |           |            |
| 4YEFA     |             |            |                  |             | No significant hits |               |             |          |           |            |
| 5JXBA     |             |            |                  |             | No significant hits |               |             |          |           |            |
| 5OAQA     |             |            |                  |             | No significant hits |               |             |          |           |            |
| 5VP3A     |             |            |                  |             | No significant hits |               |             |          |           |            |

\*Query ID: PDB ID + Chain ID for proteins in the S669 dataset

\*Subject ID: PDB ID + Chain ID for best hit in the S2298 dataset

**Table S7.** Extent of similarity between the Ssym+ forward and S2298 datasets. For each protein in the Ssym+ forward dataset, the protein with the best sequence match in the S2298 dataset is reported. The best match was obtained by using the --subject\_besthit argument in BLASTp.

| Query* ID | Subject* ID         | % Identity | Alignment Length | Query start | Query end | Subject start | Subject end | E value   | Bit score | % Coverage |
|-----------|---------------------|------------|------------------|-------------|-----------|---------------|-------------|-----------|-----------|------------|
| 1amqA     | 1AMQA               | 100        | 396              | 1           | 396       | 1             | 396         | 0         | 824       | 100        |
| 1arrA     | 1ARRA               | 100        | 53               | 1           | 53        | 1             | 53          | 7.46E-37  | 109       | 100        |
| 1bniA     | 1BNIA               | 100        | 108              | 1           | 108       | 1             | 108         | 1.87E-80  | 223       | 100        |
| 1ceyA     | 1CEYA               | 100        | 128              | 1           | 128       | 1             | 128         | 7.53E-93  | 256       | 100        |
| 1ey0A     | 1EY0A               | 100        | 136              | 1           | 136       | 1             | 136         | 8.64E-102 | 279       | 100        |
| 1ihbA     | 1IHBA               | 100        | 156              | 1           | 156       | 1             | 156         | 3.78E-115 | 315       | 100        |
| 1iobA     | 2NVHA               | 100        | 152              | 1           | 152       | 1             | 152         | 3.75E-115 | 314       | 99.3       |
| 1l63A     | 2LZMA               | 98.765     | 162              | 1           | 162       | 1             | 162         | 3.30E-121 | 330       | 100        |
| 1lz1A     | 1LZ1A               | 100        | 130              | 1           | 130       | 1             | 130         | 1.65E-97  | 268       | 100        |
| 1n0jA     | 1N0JA               | 100        | 198              | 1           | 198       | 1             | 198         | 3.96E-152 | 412       | 100        |
| 1oh0A     | 1OH0A               | 100        | 125              | 1           | 125       | 1             | 125         | 1.35E-94  | 260       | 100        |
| 1rn1C     | 1RN1C               | 100        | 104              | 1           | 104       | 1             | 104         | 2.58E-76  | 213       | 100        |
| 1vqbA     | 1VQBA               | 100        | 86               | 1           | 86        | 1             | 86          | 3.93E-63  | 177       | 100        |
| 2lzmA     | 2LZMA               | 100        | 164              | 1           | 164       | 1             | 164         | 5.22E-125 | 340       | 100        |
| 2rn2A     | 2RN2A               | 100        | 155              | 1           | 155       | 1             | 155         | 1.12E-119 | 326       | 100        |
| 3zcfA     | No significant hits |            |                  |             |           |               |             |           |           |            |
| 4bvmA     | 1HMSA               | 63.566     | 129              | 4           | 132       | 2             | 130         | 1.27E-61  | 177       | 97         |
| 4lyzA     | 4LYZA               | 100        | 129              | 1           | 129       | 1             | 129         | 4.12E-96  | 265       | 100        |
| 5ptiA     | 5PTIA               | 100        | 58               | 1           | 58        | 1             | 58          | 1.75E-41  | 121       | 100        |

\*Query ID: PDB ID + Chain ID for proteins in the Ssym+ forward dataset

\*Subject ID: PDB ID + Chain ID for best hit in the S2298 dataset

**Table S8.** Extent of similarity between the Ssym+ reverse and S2298 datasets. For each protein in the Ssym+ forward dataset, the protein with the best sequence match in the S2298 dataset is reported. The best match was obtained by using the --subject\_besthit argument in BLASTp.

| Query* ID | Subject * ID | % Identity | Alignment Length | Query start | Query end | Subject start | Subject end | E value   | Bit score | % Coverage |
|-----------|--------------|------------|------------------|-------------|-----------|---------------|-------------|-----------|-----------|------------|
| 1071A     | 2LZMA        | 98.148     | 162              | 1           | 162       | 1             | 162         | 2.00E-120 | 328       | 100        |
| 1081A     | 2LZMA        | 98.148     | 162              | 1           | 162       | 1             | 162         | 3.65E-120 | 328       | 100        |
| 1091A     | 2LZMA        | 98.148     | 162              | 1           | 162       | 1             | 162         | 1.64E-120 | 329       | 100        |
| 1101A     | 2LZMA        | 98.148     | 162              | 1           | 162       | 1             | 162         | 4.08E-120 | 328       | 100        |
| 1111A     | 2LZMA        | 98.148     | 162              | 1           | 162       | 1             | 162         | 1.57E-120 | 329       | 100        |

| Query*<br>ID | Subject *<br>ID | %<br>Identity | Alignment<br>Length | Query<br>start | Query<br>end | Subject<br>start | Subject<br>end | E value   | Bit<br>score | %<br>Coverage |
|--------------|-----------------|---------------|---------------------|----------------|--------------|------------------|----------------|-----------|--------------|---------------|
| 1121A        | 2LZMA           | 98.148        | 162                 | 1              | 162          | 1                | 162            | 2.23E-120 | 328          | 100           |
| 1131A        | 2LZMA           | 98.148        | 162                 | 1              | 162          | 1                | 162            | 2.35E-120 | 328          | 100           |
| 1141A        | 2LZMA           | 98.148        | 162                 | 1              | 162          | 1                | 162            | 7.04E-121 | 330          | 100           |
| 1151A        | 2LZMA           | 98.148        | 162                 | 1              | 162          | 1                | 162            | 2.06E-120 | 328          | 100           |
| 1181A        | 2LZMA           | 98.148        | 162                 | 1              | 162          | 1                | 162            | 7.20E-121 | 330          | 100           |
| 1191A        | 2LZMA           | 98.148        | 162                 | 1              | 162          | 1                | 162            | 7.20E-121 | 330          | 100           |
| 1201A        | 2LZMA           | 98.148        | 162                 | 1              | 162          | 1                | 162            | 7.20E-121 | 330          | 100           |
| 1221A        | 2LZMA           | 98.148        | 162                 | 1              | 162          | 1                | 162            | 7.20E-121 | 330          | 100           |
| 1231A        | 2LZMA           | 98.148        | 162                 | 1              | 162          | 1                | 162            | 7.20E-121 | 330          | 100           |
| 1251A        | 2LZMA           | 98.148        | 162                 | 1              | 162          | 1                | 162            | 7.20E-121 | 330          | 100           |
| 1261A        | 2LZMA           | 98.148        | 162                 | 1              | 162          | 1                | 162            | 1.36E-120 | 329          | 100           |
| 1271A        | 2LZMA           | 98.148        | 162                 | 1              | 162          | 1                | 162            | 1.36E-120 | 329          | 100           |
| 1281A        | 2LZMA           | 98.148        | 162                 | 1              | 162          | 1                | 162            | 1.36E-120 | 329          | 100           |
| 1371A        | 2LZMA           | 98.148        | 162                 | 1              | 162          | 1                | 162            | 3.99E-120 | 328          | 100           |
| 1491A        | 2LZMA           | 99.39         | 164                 | 1              | 164          | 1                | 164            | 1.45E-124 | 339          | 100           |
| 1501A        | 2LZMA           | 99.39         | 164                 | 1              | 164          | 1                | 164            | 2.56E-124 | 338          | 100           |
| 1721A        | 2LZMA           | 99.39         | 164                 | 1              | 164          | 1                | 164            | 2.99E-124 | 338          | 100           |
| 1b7sA        | 1LZ1A           | 99.231        | 130                 | 1              | 130          | 1                | 130            | 9.05E-97  | 266          | 100           |
| 1banA        | 1BNIA           | 99.074        | 108                 | 1              | 108          | 1                | 108            | 4.44E-80  | 222          | 100           |
| 1baoA        | 1BNIA           | 99.074        | 108                 | 1              | 108          | 1                | 108            | 4.59E-80  | 222          | 100           |
| 1bnsA        | 1BNIA           | 99.074        | 108                 | 1              | 108          | 1                | 108            | 8.40E-80  | 221          | 100           |
| 1bptA        | 5PTIA           | 98.214        | 56                  | 1              | 56           | 1                | 56             | 4.27E-39  | 115          | 100           |
| 1brgA        | 1BNIA           | 99.074        | 108                 | 1              | 108          | 1                | 108            | 9.69E-80  | 221          | 100           |
| 1brhA        | 1BNIA           | 99.074        | 108                 | 1              | 108          | 1                | 108            | 1.11E-79  | 221          | 100           |
| 1briA        | 1BNIA           | 99.074        | 108                 | 1              | 108          | 1                | 108            | 1.12E-79  | 221          | 100           |
| 1brjA        | 1BNIA           | 99.074        | 108                 | 1              | 108          | 1                | 108            | 1.12E-79  | 221          | 100           |
| 1brkA        | 1BNIA           | 99.074        | 108                 | 1              | 108          | 1                | 108            | 1.12E-79  | 221          | 100           |
| 1bsaA        | 1BNIA           | 99.065        | 107                 | 1              | 107          | 2                | 108            | 1.25E-79  | 221          | 100           |
| 1bsbA        | 1BNIA           | 99.074        | 108                 | 1              | 108          | 1                | 108            | 2.80E-80  | 223          | 100           |
| 1bscA        | 1BNIA           | 99.074        | 108                 | 1              | 108          | 1                | 108            | 2.80E-80  | 223          | 100           |
| 1bsdA        | 1BNIA           | 99.065        | 107                 | 1              | 107          | 2                | 108            | 1.25E-79  | 221          | 100           |
| 1bseA        | 1BNIA           | 99.074        | 108                 | 1              | 108          | 1                | 108            | 5.42E-80  | 222          | 100           |
| 1btiA        | 5PTIA           | 98.276        | 58                  | 1              | 58           | 1                | 58             | 1.88E-40  | 118          | 100           |
| 1ctwA        | 2LZMA           | 98.148        | 162                 | 1              | 162          | 1                | 162            | 1.41E-120 | 329          | 100           |

| Query*<br>ID | Subject *<br>ID | %<br>Identity | Alignment<br>Length | Query<br>start | Query<br>end | Subject<br>start | Subject<br>end | E value   | Bit<br>score | %<br>Coverage |
|--------------|-----------------|---------------|---------------------|----------------|--------------|------------------|----------------|-----------|--------------|---------------|
| 1cu0A        | 2LZMA           | 98.148        | 162                 | 1              | 162          | 1                | 162            | 8.21E-121 | 330          | 100           |
| 1cu2A        | 2LZMA           | 98.148        | 162                 | 1              | 162          | 1                | 162            | 5.72E-121 | 330          | 100           |
| 1cu3A        | 2LZMA           | 98.148        | 162                 | 1              | 162          | 1                | 162            | 1.03E-120 | 329          | 100           |
| 1cu5A        | 2LZMA           | 98.148        | 162                 | 1              | 162          | 1                | 162            | 5.72E-121 | 330          | 100           |
| 1cu6A        | 2LZMA           | 98.148        | 162                 | 1              | 162          | 1                | 162            | 1.52E-120 | 329          | 100           |
| 1cupA        | 2LZMA           | 98.148        | 162                 | 1              | 162          | 1                | 162            | 8.21E-121 | 330          | 100           |
| 1cuqA        | 2LZMA           | 98.148        | 162                 | 1              | 162          | 1                | 162            | 1.03E-120 | 329          | 100           |
| 1cv0A        | 2LZMA           | 98.148        | 162                 | 1              | 162          | 1                | 162            | 1.83E-120 | 329          | 100           |
| 1cv1A        | 2LZMA           | 98.148        | 162                 | 1              | 162          | 1                | 162            | 1.03E-120 | 329          | 100           |
| 1cv3A        | 2LZMA           | 98.148        | 162                 | 1              | 162          | 1                | 162            | 5.72E-121 | 330          | 100           |
| 1cv4A        | 2LZMA           | 98.148        | 162                 | 1              | 162          | 1                | 162            | 5.72E-121 | 330          | 100           |
| 1cv5A        | 2LZMA           | 98.148        | 162                 | 1              | 162          | 1                | 162            | 5.72E-121 | 330          | 100           |
| 1cv6A        | 2LZMA           | 98.148        | 162                 | 1              | 162          | 1                | 162            | 1.03E-120 | 329          | 100           |
| 1cvkA        | 2LZMA           | 98.148        | 162                 | 1              | 162          | 1                | 162            | 1.52E-120 | 329          | 100           |
| 1d2wA        | 2LZMA           | 98.148        | 162                 | 1              | 162          | 1                | 162            | 8.21E-121 | 330          | 100           |
| 1d2yA        | 2LZMA           | 98.148        | 162                 | 1              | 162          | 1                | 162            | 8.21E-121 | 330          | 100           |
| 1d3jA        | 2LZMA           | 98.148        | 162                 | 1              | 162          | 1                | 162            | 5.72E-121 | 330          | 100           |
| 1dmmA        | 1OH0A           | 96.8          | 125                 | 2              | 123          | 1                | 125            | 1.02E-89  | 248          | 101.6         |
| 1dmqA        | 1OH0A           | 96.8          | 125                 | 2              | 123          | 1                | 125            | 1.02E-89  | 248          | 101.6         |
| 1dyaA        | 2LZMA           | 99.383        | 162                 | 1              | 162          | 1                | 162            | 2.24E-122 | 333          | 100           |
| 1dybA        | 2LZMA           | 99.383        | 162                 | 1              | 162          | 1                | 162            | 1.92E-122 | 334          | 100           |
| 1dycA        | 2LZMA           | 99.383        | 162                 | 1              | 162          | 1                | 162            | 2.31E-123 | 336          | 100           |
| 1dydA        | 2LZMA           | 99.383        | 162                 | 1              | 162          | 1                | 162            | 4.57E-123 | 335          | 100           |
| 1dyeA        | 2LZMA           | 99.383        | 162                 | 1              | 162          | 1                | 162            | 7.74E-123 | 335          | 100           |
| 1dyfA        | 2LZMA           | 99.383        | 162                 | 1              | 162          | 1                | 162            | 4.28E-123 | 335          | 100           |
| 1dygA        | 2LZMA           | 99.383        | 162                 | 1              | 162          | 1                | 162            | 1.24E-122 | 334          | 100           |
| 1e6kA        | 1CEYA           | 98.438        | 128                 | 3              | 130          | 1                | 128            | 1.64E-91  | 253          | 98.5          |
| 1e6lA        | 1CEYA           | 99.213        | 127                 | 1              | 127          | 2                | 128            | 2.95E-91  | 252          | 100           |
| 1e6mA        | 1CEYA           | 98.438        | 128                 | 1              | 128          | 1                | 128            | 1.90E-91  | 253          | 100           |
| 1ey4A        | 1EY0A           | 99.265        | 136                 | 1              | 136          | 1                | 136            | 3.48E-101 | 278          | 100           |
| 1ey5A        | 1EY0A           | 99.259        | 135                 | 1              | 135          | 2                | 136            | 1.87E-100 | 276          | 100           |
| 1ey6A        | 1EY0A           | 99.259        | 135                 | 1              | 135          | 2                | 136            | 2.78E-100 | 275          | 100           |
| 1ey7A        | 1EY0A           | 99.259        | 135                 | 1              | 135          | 2                | 136            | 1.19E-100 | 276          | 100           |
| 1fanA        | 5PTIA           | 98.276        | 58                  | 1              | 58           | 1                | 58             | 1.88E-40  | 118          | 100           |

| Query*<br>ID | Subject *<br>ID | %<br>Identity | Alignment<br>Length | Query<br>start | Query<br>end | Subject<br>start | Subject<br>end | E value   | Bit<br>score | %<br>Coverage |
|--------------|-----------------|---------------|---------------------|----------------|--------------|------------------|----------------|-----------|--------------|---------------|
| 1flqA        | 4LYZA           | 99.225        | 129                 | 1              | 129          | 1                | 129            | 2.36E-95  | 263          | 100           |
| 1fluA        | 4LYZA           | 99.225        | 129                 | 1              | 129          | 1                | 129            | 2.36E-95  | 263          | 100           |
| 1flwA        | 4LYZA           | 99.225        | 129                 | 1              | 129          | 1                | 129            | 2.36E-95  | 263          | 100           |
| 1flyA        | 4LYZA           | 99.225        | 129                 | 1              | 129          | 1                | 129            | 2.36E-95  | 263          | 100           |
| 1fn5A        | 4LYZA           | 99.225        | 129                 | 1              | 129          | 1                | 129            | 2.36E-95  | 263          | 100           |
| 1g06A        | 2LZMA           | 98.171        | 164                 | 1              | 164          | 1                | 164            | 5.31E-122 | 333          | 100           |
| 1g07A        | 2LZMA           | 98.148        | 162                 | 1              | 162          | 1                | 162            | 4.03E-120 | 328          | 100           |
| 1g0gA        | 2LZMA           | 98.148        | 162                 | 1              | 162          | 1                | 162            | 1.42E-120 | 329          | 100           |
| 1g0jA        | 2LZMA           | 98.171        | 164                 | 1              | 164          | 1                | 164            | 2.63E-122 | 333          | 100           |
| 1g0kA        | 2LZMA           | 98.171        | 164                 | 1              | 164          | 1                | 164            | 1.78E-121 | 331          | 100           |
| 1g0lA        | 2LZMA           | 98.171        | 164                 | 1              | 164          | 1                | 164            | 4.71E-122 | 333          | 100           |
| 1g0mA        | 2LZMA           | 98.148        | 162                 | 1              | 162          | 1                | 162            | 2.00E-120 | 328          | 100           |
| 1g0pA        | 2LZMA           | 98.171        | 164                 | 1              | 164          | 1                | 164            | 1.76E-121 | 331          | 100           |
| 1g0qA        | 2LZMA           | 98.171        | 164                 | 1              | 164          | 1                | 164            | 1.55E-122 | 334          | 100           |
| 1g1vA        | 2LZMA           | 98.148        | 162                 | 1              | 162          | 1                | 162            | 1.36E-120 | 329          | 100           |
| 1g1wA        | 2LZMA           | 98.148        | 162                 | 1              | 162          | 1                | 162            | 2.35E-120 | 328          | 100           |
| 1gayA        | 1LZ1A           | 99.231        | 130                 | 1              | 130          | 1                | 130            | 1.97E-96  | 265          | 100           |
| 1gazA        | 1LZ1A           | 99.231        | 130                 | 1              | 130          | 1                | 130            | 2.27E-97  | 268          | 100           |
| 1gb0A        | 1LZ1A           | 99.231        | 130                 | 1              | 130          | 1                | 130            | 4.20E-97  | 267          | 100           |
| 1gb2A        | 1LZ1A           | 99.231        | 130                 | 1              | 130          | 1                | 130            | 3.84E-97  | 267          | 100           |
| 1gb3A        | 1LZ1A           | 99.231        | 130                 | 1              | 130          | 1                | 130            | 6.88E-97  | 266          | 100           |
| 1gb5A        | 1LZ1A           | 99.231        | 130                 | 1              | 130          | 1                | 130            | 1.97E-96  | 265          | 100           |
| 1gb6A        | 1LZ1A           | 99.231        | 130                 | 1              | 130          | 1                | 130            | 2.27E-97  | 268          | 100           |
| 1gb7A        | 1LZ1A           | 99.231        | 130                 | 1              | 130          | 1                | 130            | 4.20E-97  | 267          | 100           |
| 1gb8A        | 1LZ1A           | 99.231        | 130                 | 1              | 130          | 1                | 130            | 3.84E-97  | 267          | 100           |
| 1gb9A        | 1LZ1A           | 99.231        | 130                 | 1              | 130          | 1                | 130            | 6.88E-97  | 266          | 100           |
| 1gboA        | 1LZ1A           | 99.231        | 130                 | 1              | 130          | 1                | 130            | 1.97E-96  | 265          | 100           |
| 1gbwA        | 1LZ1A           | 99.231        | 130                 | 1              | 130          | 1                | 130            | 2.27E-97  | 268          | 100           |
| 1gbxA        | 1LZ1A           | 99.231        | 130                 | 1              | 130          | 1                | 130            | 4.20E-97  | 267          | 100           |
| 1gbyA        | 1LZ1A           | 99.231        | 130                 | 1              | 130          | 1                | 130            | 3.84E-97  | 267          | 100           |
| 1gbzA        | 1LZ1A           | 99.231        | 130                 | 1              | 130          | 1                | 130            | 6.88E-97  | 266          | 100           |
| 1gf8A        | 1LZ1A           | 99.231        | 130                 | 1              | 130          | 1                | 130            | 9.05E-97  | 266          | 100           |
| 1gf9A        | 1LZ1A           | 99.231        | 130                 | 1              | 130          | 1                | 130            | 1.10E-96  | 266          | 100           |
| 1gfaA        | 1LZ1A           | 99.231        | 130                 | 1              | 130          | 1                | 130            | 2.04E-96  | 265          | 100           |

| Query*<br>ID | Subject *<br>ID | %<br>Identity | Alignment<br>Length | Query<br>start | Query<br>end | Subject<br>start | Subject<br>end | E value   | Bit<br>score | %<br>Coverage |
|--------------|-----------------|---------------|---------------------|----------------|--------------|------------------|----------------|-----------|--------------|---------------|
| lgfeA        | 1LZ1A           | 99.231        | 130                 | 1              | 130          | 1                | 130            | 1.87E-96  | 265          | 100           |
| lgfgA        | 1LZ1A           | 99.231        | 130                 | 1              | 130          | 1                | 130            | 1.99E-96  | 265          | 100           |
| lgfhA        | 1LZ1A           | 99.231        | 130                 | 1              | 130          | 1                | 130            | 1.10E-96  | 266          | 100           |
| lgfjA        | 1LZ1A           | 99.231        | 130                 | 1              | 130          | 1                | 130            | 2.04E-96  | 265          | 100           |
| lgfkA        | 1LZ1A           | 99.231        | 130                 | 1              | 130          | 1                | 130            | 1.87E-96  | 265          | 100           |
| lgfrA        | 1LZ1A           | 99.231        | 130                 | 1              | 130          | 1                | 130            | 1.99E-96  | 265          | 100           |
| lgftA        | 1LZ1A           | 99.231        | 130                 | 1              | 130          | 1                | 130            | 1.10E-96  | 266          | 100           |
| lgfuA        | 1LZ1A           | 99.231        | 130                 | 1              | 130          | 1                | 130            | 2.04E-96  | 265          | 100           |
| lgfvA        | 1LZ1A           | 99.231        | 130                 | 1              | 130          | 1                | 130            | 1.87E-96  | 265          | 100           |
| lgobA        | 2RN2A           | 99.355        | 155                 | 1              | 155          | 1                | 155            | 5.45E-119 | 324          | 100           |
| lhemA        | 4LYZA           | 99.225        | 129                 | 1              | 129          | 1                | 129            | 1.26E-95  | 263          | 100           |
| lhoA         | 4LYZA           | 99.225        | 129                 | 1              | 129          | 1                | 129            | 6.98E-96  | 264          | 100           |
| lherA        | 4LYZA           | 99.225        | 129                 | 1              | 129          | 1                | 129            | 1.52E-95  | 263          | 100           |
| lhibA        | 2NVHA           | 98.667        | 150                 | 1              | 149          | 3                | 152            | 1.24E-109 | 300          | 100           |
| lhn1A        | 1LZ1A           | 99.231        | 130                 | 1              | 130          | 1                | 130            | 1.42E-96  | 266          | 100           |
| li6sA        | 2LZMA           | 98.148        | 162                 | 1              | 162          | 1                | 162            | 3.03E-120 | 328          | 100           |
| linuA        | 1LZ1A           | 99.231        | 130                 | 1              | 130          | 1                | 130            | 1.99E-96  | 265          | 100           |
| liosA        | 4LYZA           | 99.225        | 129                 | 1              | 129          | 1                | 129            | 3.55E-95  | 262          | 100           |
| liotA        | 4LYZA           | 99.225        | 129                 | 1              | 129          | 1                | 129            | 1.49E-95  | 263          | 100           |
| lir7A        | 4LYZA           | 99.225        | 129                 | 1              | 129          | 1                | 129            | 1.14E-95  | 263          | 100           |
| lir8A        | 4LYZA           | 99.225        | 129                 | 1              | 129          | 1                | 129            | 1.14E-95  | 263          | 100           |
| lir9A        | 4LYZA           | 99.225        | 129                 | 1              | 129          | 1                | 129            | 1.14E-95  | 263          | 100           |
| lkabA        | 1EY0A           | 99.265        | 136                 | 1              | 136          | 1                | 136            | 9.36E-101 | 277          | 100           |
| lkvaA        | 2RN2A           | 99.355        | 155                 | 1              | 155          | 1                | 155            | 1.31E-118 | 323          | 100           |
| lkvbA        | 2RN2A           | 99.355        | 155                 | 1              | 155          | 1                | 155            | 1.86E-118 | 323          | 100           |
| lkvcA        | 2RN2A           | 99.355        | 155                 | 1              | 155          | 1                | 155            | 5.88E-119 | 324          | 100           |
| l100A        | 2LZMA           | 99.39         | 164                 | 1              | 164          | 1                | 164            | 5.83E-124 | 338          | 100           |
| l102A        | 2LZMA           | 99.39         | 164                 | 1              | 164          | 1                | 164            | 2.65E-124 | 338          | 100           |
| l103A        | 2LZMA           | 99.39         | 164                 | 1              | 164          | 1                | 164            | 3.72E-124 | 338          | 100           |
| l104A        | 2LZMA           | 99.39         | 164                 | 1              | 164          | 1                | 164            | 4.95E-124 | 338          | 100           |
| l106A        | 2LZMA           | 99.39         | 164                 | 1              | 164          | 1                | 164            | 4.02E-124 | 338          | 100           |
| l107A        | 2LZMA           | 99.39         | 164                 | 1              | 164          | 1                | 164            | 6.73E-124 | 337          | 100           |
| l108A        | 2LZMA           | 99.39         | 164                 | 1              | 164          | 1                | 164            | 6.44E-124 | 337          | 100           |
| l109A        | 2LZMA           | 99.39         | 164                 | 1              | 164          | 1                | 164            | 3.56E-124 | 338          | 100           |

| Query*<br>ID | Subject *<br>ID | %<br>Identity | Alignment<br>Length | Query<br>start | Query<br>end | Subject<br>start | Subject<br>end | E value   | Bit<br>score | %<br>Coverage |
|--------------|-----------------|---------------|---------------------|----------------|--------------|------------------|----------------|-----------|--------------|---------------|
| 1110A        | 2LZMA           | 99.39         | 164                 | 1              | 164          | 1                | 164            | 2.83E-124 | 338          | 100           |
| 1111A        | 2LZMA           | 99.39         | 164                 | 1              | 164          | 1                | 164            | 3.68E-124 | 338          | 100           |
| 1112A        | 2LZMA           | 99.39         | 164                 | 1              | 164          | 1                | 164            | 3.26E-124 | 338          | 100           |
| 1113A        | 2LZMA           | 99.39         | 164                 | 1              | 164          | 1                | 164            | 6.80E-124 | 337          | 100           |
| 1114A        | 2LZMA           | 99.39         | 164                 | 1              | 164          | 1                | 164            | 9.86E-125 | 340          | 100           |
| 1115A        | 2LZMA           | 99.39         | 164                 | 1              | 164          | 1                | 164            | 2.56E-124 | 338          | 100           |
| 1116A        | 2LZMA           | 99.39         | 164                 | 1              | 164          | 1                | 164            | 6.16E-124 | 338          | 100           |
| 1117A        | 2LZMA           | 99.39         | 164                 | 1              | 164          | 1                | 164            | 6.71E-125 | 340          | 100           |
| 1118A        | 2LZMA           | 99.39         | 164                 | 1              | 164          | 1                | 164            | 4.02E-124 | 338          | 100           |
| 1119A        | 2LZMA           | 99.39         | 164                 | 1              | 164          | 1                | 164            | 3.26E-124 | 338          | 100           |
| 1120A        | 2LZMA           | 99.39         | 164                 | 1              | 164          | 1                | 164            | 2.71E-124 | 338          | 100           |
| 1121A        | 2LZMA           | 99.39         | 164                 | 1              | 164          | 1                | 164            | 4.43E-124 | 338          | 100           |
| 1122A        | 2LZMA           | 99.39         | 164                 | 1              | 164          | 1                | 164            | 6.23E-124 | 338          | 100           |
| 1123A        | 2LZMA           | 99.39         | 164                 | 1              | 164          | 1                | 164            | 3.05E-124 | 338          | 100           |
| 1124A        | 2LZMA           | 99.39         | 164                 | 1              | 164          | 1                | 164            | 3.19E-124 | 338          | 100           |
| 1133A        | 2LZMA           | 99.39         | 164                 | 1              | 164          | 1                | 164            | 1.90E-124 | 339          | 100           |
| 1137A        | 2LZMA           | 99.39         | 164                 | 1              | 164          | 1                | 164            | 4.02E-124 | 338          | 100           |
| 1138A        | 2LZMA           | 99.39         | 164                 | 1              | 164          | 1                | 164            | 2.10E-124 | 339          | 100           |
| 1139A        | 2LZMA           | 98.171        | 164                 | 1              | 164          | 1                | 164            | 7.46E-122 | 332          | 100           |
| 1142A        | 2LZMA           | 99.39         | 164                 | 1              | 164          | 1                | 164            | 2.08E-124 | 339          | 100           |
| 1144A        | 2LZMA           | 99.39         | 164                 | 1              | 164          | 1                | 164            | 3.37E-124 | 338          | 100           |
| 1145A        | 2LZMA           | 99.39         | 164                 | 1              | 164          | 1                | 164            | 2.08E-124 | 339          | 100           |
| 1146A        | 2LZMA           | 99.39         | 164                 | 1              | 164          | 1                | 164            | 2.08E-124 | 339          | 100           |
| 1147A        | 2LZMA           | 99.39         | 164                 | 1              | 164          | 1                | 164            | 3.37E-124 | 338          | 100           |
| 1148A        | 2LZMA           | 99.39         | 164                 | 1              | 164          | 1                | 164            | 1.99E-124 | 339          | 100           |
| 1152A        | 2LZMA           | 99.39         | 164                 | 1              | 164          | 1                | 164            | 9.86E-125 | 340          | 100           |
| 1153A        | 2LZMA           | 99.39         | 164                 | 1              | 164          | 1                | 164            | 3.09E-124 | 338          | 100           |
| 1155A        | 2LZMA           | 98.148        | 162                 | 1              | 162          | 1                | 162            | 1.52E-120 | 329          | 100           |
| 1156A        | 2LZMA           | 99.39         | 164                 | 1              | 164          | 1                | 164            | 4.53E-124 | 338          | 100           |
| 1157A        | 2LZMA           | 99.383        | 162                 | 1              | 162          | 1                | 162            | 7.41E-123 | 335          | 100           |
| 1159A        | 2LZMA           | 98.148        | 162                 | 1              | 162          | 1                | 162            | 2.30E-120 | 328          | 100           |
| 1160A        | 2LZMA           | 99.39         | 164                 | 1              | 164          | 1                | 164            | 3.05E-124 | 338          | 100           |
| 1161A        | 2LZMA           | 98.148        | 162                 | 1              | 162          | 1                | 162            | 1.57E-120 | 329          | 100           |
| 1162A        | 2LZMA           | 98.148        | 162                 | 1              | 162          | 1                | 162            | 3.35E-120 | 328          | 100           |

| Query*<br>ID | Subject *<br>ID | %<br>Identity | Alignment<br>Length | Query<br>start | Query<br>end | Subject<br>start | Subject<br>end | E value   | Bit<br>score | %<br>Coverage |
|--------------|-----------------|---------------|---------------------|----------------|--------------|------------------|----------------|-----------|--------------|---------------|
| 1l65A        | 2LZMA           | 98.148        | 162                 | 1              | 162          | 1                | 162            | 2.93E-120 | 328          | 100           |
| 1l66A        | 2LZMA           | 98.148        | 162                 | 1              | 162          | 1                | 162            | 1.68E-120 | 329          | 100           |
| 1l67A        | 2LZMA           | 98.148        | 162                 | 1              | 162          | 1                | 162            | 1.52E-120 | 329          | 100           |
| 1l68A        | 2LZMA           | 98.148        | 162                 | 1              | 162          | 1                | 162            | 8.03E-121 | 330          | 100           |
| 1l69A        | 2LZMA           | 99.383        | 162                 | 1              | 162          | 1                | 162            | 7.65E-123 | 335          | 100           |
| 1l76A        | 2LZMA           | 98.148        | 162                 | 1              | 162          | 1                | 162            | 3.90E-120 | 328          | 100           |
| 1l77A        | 2LZMA           | 98.148        | 162                 | 1              | 162          | 1                | 162            | 1.15E-120 | 329          | 100           |
| 1l85A        | 2LZMA           | 98.148        | 162                 | 1              | 162          | 1                | 162            | 5.25E-120 | 328          | 100           |
| 1l86A        | 2LZMA           | 98.148        | 162                 | 1              | 162          | 1                | 162            | 2.11E-120 | 328          | 100           |
| 1l87A        | 2LZMA           | 98.148        | 162                 | 1              | 162          | 1                | 162            | 1.75E-120 | 329          | 100           |
| 1l88A        | 2LZMA           | 98.148        | 162                 | 1              | 162          | 1                | 162            | 1.83E-120 | 329          | 100           |
| 1l90A        | 2LZMA           | 98.148        | 162                 | 1              | 162          | 1                | 162            | 1.52E-120 | 329          | 100           |
| 1l91A        | 2LZMA           | 98.148        | 162                 | 1              | 162          | 1                | 162            | 1.41E-120 | 329          | 100           |
| 1l92A        | 2LZMA           | 98.148        | 162                 | 1              | 162          | 1                | 162            | 7.60E-121 | 330          | 100           |
| 1l93A        | 2LZMA           | 98.148        | 162                 | 1              | 162          | 1                | 162            | 5.72E-121 | 330          | 100           |
| 1l94A        | 2LZMA           | 98.148        | 162                 | 1              | 162          | 1                | 162            | 7.86E-121 | 330          | 100           |
| 1l95A        | 2LZMA           | 98.148        | 162                 | 1              | 162          | 1                | 162            | 2.75E-120 | 328          | 100           |
| 1l96A        | 2LZMA           | 99.383        | 162                 | 1              | 162          | 1                | 162            | 1.45E-122 | 334          | 100           |
| 1l98A        | 2LZMA           | 99.39         | 164                 | 1              | 164          | 1                | 164            | 2.10E-124 | 339          | 100           |
| 1l99A        | 2LZMA           | 99.39         | 164                 | 1              | 164          | 1                | 164            | 1.03E-123 | 337          | 100           |
| 1lavA        | 2RN2A           | 99.355        | 155                 | 1              | 155          | 1                | 155            | 3.36E-119 | 325          | 100           |
| 1lawA        | 2RN2A           | 99.355        | 155                 | 1              | 155          | 1                | 155            | 1.82E-119 | 325          | 100           |
| 1lhhA        | 1LZ1A           | 99.231        | 130                 | 1              | 130          | 1                | 130            | 1.04E-96  | 266          | 100           |
| 1lhiA        | 1LZ1A           | 99.231        | 130                 | 1              | 130          | 1                | 130            | 4.85E-96  | 264          | 100           |
| 1lhjA        | 1LZ1A           | 99.231        | 130                 | 1              | 130          | 1                | 130            | 4.85E-96  | 264          | 100           |
| 1lhkA        | 1LZ1A           | 99.231        | 130                 | 1              | 130          | 1                | 130            | 1.39E-96  | 266          | 100           |
| 1lhlA        | 1LZ1A           | 99.231        | 130                 | 1              | 130          | 1                | 130            | 7.11E-97  | 266          | 100           |
| 1lsnA        | 4LYZA           | 98.45         | 129                 | 1              | 129          | 1                | 129            | 7.48E-95  | 261          | 100           |
| 1lyeA        | 2LZMA           | 98.148        | 162                 | 1              | 162          | 1                | 162            | 1.39E-120 | 329          | 100           |
| 1lyfA        | 2LZMA           | 98.148        | 162                 | 1              | 162          | 1                | 162            | 8.58E-121 | 330          | 100           |
| 1lygA        | 2LZMA           | 98.148        | 162                 | 1              | 162          | 1                | 162            | 2.30E-120 | 328          | 100           |
| 1lyhA        | 2LZMA           | 98.148        | 162                 | 1              | 162          | 1                | 162            | 3.69E-120 | 328          | 100           |
| 1lyiA        | 2LZMA           | 98.148        | 162                 | 1              | 162          | 1                | 162            | 3.35E-120 | 328          | 100           |
| 1lyjA        | 2LZMA           | 98.148        | 162                 | 1              | 162          | 1                | 162            | 1.42E-120 | 329          | 100           |

| Query*<br>ID | Subject *<br>ID | %<br>Identity | Alignment<br>Length | Query<br>start | Query<br>end | Subject<br>start | Subject<br>end | E value   | Bit<br>score | %<br>Coverage |
|--------------|-----------------|---------------|---------------------|----------------|--------------|------------------|----------------|-----------|--------------|---------------|
| 1mx2A        | 1IHBA           | 99.359        | 156                 | 1              | 156          | 1                | 156            | 1.23E-113 | 311          | 100           |
| 1mx4A        | 1IHBA           | 99.359        | 156                 | 1              | 156          | 1                | 156            | 9.02E-114 | 311          | 100           |
| 1mx6A        | 1IHBA           | 99.359        | 156                 | 1              | 156          | 1                | 156            | 1.23E-113 | 311          | 100           |
| 1mykA        | 1ARRA           | 97.872        | 47                  | 1              | 47           | 6                | 52             | 5.86E-31  | 94           | 100           |
| 1nagA        | 5PTIA           | 98.214        | 56                  | 1              | 56           | 1                | 56             | 3.50E-39  | 115          | 100           |
| 1ouaA        | 1LZ1A           | 99.231        | 130                 | 1              | 130          | 1                | 130            | 7.34E-97  | 266          | 100           |
| 1oubA        | 1LZ1A           | 99.231        | 130                 | 1              | 130          | 1                | 130            | 6.65E-97  | 266          | 100           |
| 1oucA        | 1LZ1A           | 99.231        | 130                 | 1              | 130          | 1                | 130            | 6.65E-97  | 266          | 100           |
| 1oudA        | 1LZ1A           | 99.231        | 130                 | 1              | 130          | 1                | 130            | 6.65E-97  | 266          | 100           |
| 1oueA        | 1LZ1A           | 99.231        | 130                 | 1              | 130          | 1                | 130            | 6.65E-97  | 266          | 100           |
| 1oufA        | 1LZ1A           | 100           | 129                 | 1              | 129          | 1                | 129            | 6.65E-97  | 266          | 99.2          |
| 1ougA        | 1LZ1A           | 99.231        | 130                 | 1              | 130          | 1                | 130            | 6.65E-97  | 266          | 100           |
| 1ouhA        | 1LZ1A           | 99.231        | 130                 | 1              | 130          | 1                | 130            | 6.65E-97  | 266          | 100           |
| 1ouiA        | 1LZ1A           | 99.231        | 130                 | 1              | 130          | 1                | 130            | 6.65E-97  | 266          | 100           |
| 1oujA        | 1LZ1A           | 99.231        | 130                 | 1              | 130          | 1                | 130            | 6.65E-97  | 266          | 100           |
| 1p2lA        | 2LZMA           | 98.171        | 164                 | 1              | 164          | 1                | 164            | 1.55E-122 | 334          | 100           |
| 1p2rA        | 2LZMA           | 98.171        | 164                 | 1              | 164          | 1                | 164            | 1.39E-122 | 334          | 100           |
| 1p36A        | 2LZMA           | 98.171        | 164                 | 1              | 164          | 1                | 164            | 1.39E-122 | 334          | 100           |
| 1p46A        | 2LZMA           | 98.171        | 164                 | 1              | 164          | 1                | 164            | 4.55E-122 | 333          | 100           |
| 1p64A        | 2LZMA           | 98.171        | 164                 | 1              | 164          | 1                | 164            | 3.90E-122 | 333          | 100           |
| 1p6yA        | 2LZMA           | 98.171        | 164                 | 1              | 164          | 1                | 164            | 1.22E-121 | 332          | 100           |
| 1p7sA        | 2LZMA           | 98.171        | 164                 | 1              | 164          | 1                | 164            | 1.55E-122 | 334          | 100           |
| 1qirA        | 1AMQA           | 99.747        | 396                 | 1              | 396          | 1                | 396            | 0         | 819          | 100           |
| 1qisA        | 1AMQA           | 99.747        | 396                 | 1              | 396          | 1                | 396            | 0         | 819          | 100           |
| 1qitA        | 1AMQA           | 99.747        | 396                 | 1              | 396          | 1                | 396            | 0         | 819          | 100           |
| 1qs5A        | 2LZMA           | 98.148        | 162                 | 1              | 162          | 1                | 162            | 2.66E-120 | 328          | 100           |
| 1qs9A        | 2LZMA           | 98.148        | 162                 | 1              | 162          | 1                | 162            | 1.29E-120 | 329          | 100           |
| 1qsbA        | 2LZMA           | 98.148        | 162                 | 1              | 162          | 1                | 162            | 2.96E-120 | 328          | 100           |
| 1qt6A        | 2LZMA           | 98.171        | 164                 | 1              | 164          | 1                | 164            | 4.65E-122 | 333          | 100           |
| 1qt7A        | 2LZMA           | 98.171        | 164                 | 1              | 164          | 1                | 164            | 8.24E-122 | 332          | 100           |
| 1qtbA        | 2LZMA           | 98.148        | 162                 | 1              | 162          | 1                | 162            | 1.29E-120 | 329          | 100           |
| 1qtcA        | 2LZMA           | 98.148        | 162                 | 1              | 162          | 1                | 162            | 3.82E-120 | 328          | 100           |
| 1qtdA        | 2LZMA           | 98.148        | 162                 | 1              | 162          | 1                | 162            | 6.05E-120 | 327          | 100           |
| 1rbrA        | 2RN2A           | 99.355        | 155                 | 1              | 155          | 1                | 155            | 3.22E-118 | 322          | 100           |

| Query*<br>ID | Subject *<br>ID | %<br>Identity | Alignment<br>Length | Query<br>start | Query<br>end | Subject<br>start | Subject<br>end | E value   | Bit<br>score | %<br>Coverage |
|--------------|-----------------|---------------|---------------------|----------------|--------------|------------------|----------------|-----------|--------------|---------------|
| 1rbsA        | 2RN2A           | 99.355        | 155                 | 1              | 155          | 1                | 155            | 2.27E-118 | 323          | 100           |
| 1rbtA        | 2RN2A           | 99.355        | 155                 | 1              | 155          | 1                | 155            | 1.43E-118 | 323          | 100           |
| 1rbuA        | 2RN2A           | 99.355        | 155                 | 1              | 155          | 1                | 155            | 6.93E-119 | 324          | 100           |
| 1rbvA        | 2RN2A           | 99.355        | 155                 | 1              | 155          | 1                | 155            | 7.41E-119 | 324          | 100           |
| 1rdaA        | 2RN2A           | 99.355        | 155                 | 1              | 155          | 1                | 155            | 5.88E-119 | 324          | 100           |
| 1rdbA        | 2RN2A           | 99.355        | 155                 | 1              | 155          | 1                | 155            | 3.11E-119 | 325          | 100           |
| 1rdcA        | 2RN2A           | 99.355        | 155                 | 1              | 155          | 1                | 155            | 5.88E-119 | 324          | 100           |
| 1rgcA        | 1RN1C           | 99.038        | 104                 | 1              | 104          | 1                | 104            | 8.62E-76  | 211          | 100           |
| 1sycA        | 1EY0A           | 99.265        | 136                 | 1              | 136          | 1                | 136            | 1.91E-100 | 276          | 100           |
| 1syeA        | 1EY0A           | 99.265        | 136                 | 1              | 136          | 1                | 136            | 1.02E-100 | 276          | 100           |
| 1sygA        | 1EY0A           | 99.265        | 136                 | 1              | 136          | 1                | 136            | 1.02E-100 | 276          | 100           |
| 1tlaA        | 2LZMA           | 98.148        | 162                 | 1              | 162          | 1                | 162            | 3.99E-120 | 328          | 100           |
| 1varA        | 1N0JA           | 99.495        | 198                 | 1              | 198          | 1                | 198            | 1.35E-151 | 410          | 100           |
| 1vqgA        | 1VQBA           | 98.837        | 86                  | 1              | 86           | 1                | 86             | 9.77E-63  | 177          | 100           |
| 1vqhA        | 1VQBA           | 98.837        | 86                  | 1              | 86           | 1                | 86             | 1.04E-62  | 177          | 100           |
| 1vqiA        | 1VQBA           | 98.837        | 86                  | 1              | 86           | 1                | 86             | 5.70E-63  | 177          | 100           |
| 1vqiA        | 1VQBA           | 98.837        | 86                  | 1              | 86           | 1                | 86             | 5.77E-63  | 177          | 100           |
| 1wqmA        | 1LZ1A           | 99.231        | 130                 | 1              | 130          | 1                | 130            | 4.15E-97  | 267          | 100           |
| 1wqnA        | 1LZ1A           | 99.231        | 130                 | 1              | 130          | 1                | 130            | 4.15E-97  | 267          | 100           |
| 1wqoA        | 1LZ1A           | 99.231        | 130                 | 1              | 130          | 1                | 130            | 4.15E-97  | 267          | 100           |
| 1wqpA        | 1LZ1A           | 99.231        | 130                 | 1              | 130          | 1                | 130            | 4.15E-97  | 267          | 100           |
| 1wqqA        | 1LZ1A           | 99.231        | 130                 | 1              | 130          | 1                | 130            | 4.15E-97  | 267          | 100           |
| 1wqrA        | 1LZ1A           | 99.231        | 130                 | 1              | 130          | 1                | 130            | 4.15E-97  | 267          | 100           |
| 1yamA        | 1LZ1A           | 99.231        | 130                 | 1              | 130          | 1                | 130            | 2.62E-97  | 268          | 100           |
| 1yanA        | 1LZ1A           | 99.231        | 130                 | 1              | 130          | 1                | 130            | 2.62E-97  | 268          | 100           |
| 1yaoA        | 1LZ1A           | 99.231        | 130                 | 1              | 130          | 1                | 130            | 2.62E-97  | 268          | 100           |
| 1yapA        | 1LZ1A           | 99.231        | 130                 | 1              | 130          | 1                | 130            | 2.62E-97  | 268          | 100           |
| 1yaqA        | 1LZ1A           | 99.231        | 130                 | 1              | 130          | 1                | 130            | 2.62E-97  | 268          | 100           |
| 1yhbA        | 1VQBA           | 98.837        | 86                  | 1              | 86           | 1                | 86             | 8.83E-63  | 177          | 98.9          |
| 2061A        | 2LZMA           | 98.148        | 162                 | 1              | 162          | 1                | 162            | 7.20E-121 | 330          | 100           |
| 2171A        | 2LZMA           | 98.148        | 162                 | 1              | 162          | 1                | 162            | 1.71E-120 | 329          | 100           |
| 2211A        | 2LZMA           | 98.148        | 162                 | 1              | 162          | 1                | 162            | 7.20E-121 | 330          | 100           |
| 2241A        | 2LZMA           | 98.148        | 162                 | 1              | 162          | 1                | 162            | 7.20E-121 | 330          | 100           |
| 2301A        | 2LZMA           | 98.171        | 164                 | 1              | 164          | 1                | 164            | 3.62E-122 | 333          | 100           |

| Query* ID | Subject * ID | % Identity | Alignment Length | Query start | Query end | Subject start | Subject end | E value   | Bit score | % Coverage |
|-----------|--------------|------------|------------------|-------------|-----------|---------------|-------------|-----------|-----------|------------|
| 2311A     | 2LZMA        | 98.148     | 162              | 1           | 162       | 1             | 162         | 3.73E-120 | 328       | 100        |
| 2321A     | 2LZMA        | 98.148     | 162              | 1           | 162       | 1             | 162         | 3.73E-120 | 328       | 100        |
| 2331A     | 2LZMA        | 98.148     | 162              | 1           | 162       | 1             | 162         | 1.15E-120 | 329       | 100        |
| 2341A     | 2LZMA        | 98.148     | 162              | 1           | 162       | 1             | 162         | 1.15E-120 | 329       | 100        |
| 2351A     | 2LZMA        | 98.148     | 162              | 1           | 162       | 1             | 162         | 1.32E-120 | 329       | 100        |
| 2361A     | 2LZMA        | 98.148     | 162              | 1           | 162       | 1             | 162         | 1.32E-120 | 329       | 100        |
| 2371A     | 2LZMA        | 98.171     | 164              | 1           | 164       | 1             | 164         | 4.04E-122 | 333       | 100        |
| 2381A     | 2LZMA        | 98.148     | 162              | 1           | 162       | 1             | 162         | 1.32E-120 | 329       | 100        |
| 2391A     | 2LZMA        | 98.148     | 162              | 1           | 162       | 1             | 162         | 1.41E-120 | 329       | 100        |
| 2401A     | 2LZMA        | 98.148     | 162              | 1           | 162       | 1             | 162         | 1.41E-120 | 329       | 100        |
| 2411A     | 2LZMA        | 98.148     | 162              | 1           | 162       | 1             | 162         | 1.41E-120 | 329       | 100        |
| 2421A     | 2LZMA        | 98.171     | 164              | 1           | 164       | 1             | 164         | 5.08E-122 | 333       | 100        |
| 2431A     | 2LZMA        | 98.148     | 162              | 1           | 162       | 1             | 162         | 1.41E-120 | 329       | 100        |
| 2441A     | 2LZMA        | 98.148     | 162              | 1           | 162       | 1             | 162         | 1.41E-120 | 329       | 100        |
| 2451A     | 2LZMA        | 98.171     | 164              | 1           | 164       | 1             | 164         | 8.61E-122 | 332       | 100        |
| 2461A     | 2LZMA        | 98.171     | 164              | 1           | 164       | 1             | 164         | 1.52E-121 | 332       | 100        |
| 2471A     | 2LZMA        | 98.171     | 164              | 1           | 164       | 1             | 164         | 5.08E-122 | 333       | 100        |
| 2531A     | 2LZMA        | 98.171     | 164              | 1           | 164       | 1             | 164         | 1.14E-121 | 332       | 100        |
| 2541A     | 2LZMA        | 98.171     | 164              | 1           | 164       | 1             | 164         | 5.73E-122 | 333       | 100        |
| 2551A     | 2LZMA        | 98.171     | 164              | 1           | 164       | 1             | 164         | 4.97E-122 | 333       | 100        |
| 2exzA     | 1EY0A        | 99.259     | 135              | 1           | 135       | 2             | 136         | 1.38E-100 | 276       | 100        |
| 2ey1A     | 1EY0A        | 99.265     | 136              | 1           | 136       | 1             | 136         | 4.53E-101 | 278       | 100        |
| 2ey2A     | 1EY0A        | 99.265     | 136              | 1           | 136       | 1             | 136         | 4.20E-101 | 278       | 100        |
| 2ey5A     | 1EY0A        | 99.259     | 135              | 1           | 135       | 2             | 136         | 9.80E-101 | 276       | 100        |
| 2ey6A     | 1EY0A        | 99.259     | 135              | 1           | 135       | 2             | 136         | 1.87E-100 | 276       | 100        |
| 2eyfA     | 1EY0A        | 99.259     | 135              | 1           | 135       | 2             | 136         | 1.87E-100 | 276       | 100        |
| 2eyhA     | 1EY0A        | 99.259     | 135              | 1           | 135       | 2             | 136         | 9.80E-101 | 276       | 100        |
| 2eyjA     | 1EY0A        | 99.265     | 136              | 1           | 136       | 1             | 136         | 4.53E-101 | 278       | 100        |
| 2eylA     | 1EY0A        | 99.265     | 136              | 1           | 136       | 1             | 136         | 1.82E-101 | 278       | 100        |
| 2eymA     | 1EY0A        | 99.259     | 135              | 1           | 135       | 2             | 136         | 1.38E-100 | 276       | 100        |
| 2eyoA     | 1EY0A        | 99.259     | 135              | 1           | 135       | 2             | 136         | 9.80E-101 | 276       | 100        |
| 2eypA     | 1EY0A        | 99.265     | 136              | 1           | 136       | 1             | 136         | 4.53E-101 | 278       | 100        |
| 2f0dA     | 1EY0A        | 99.265     | 136              | 1           | 136       | 1             | 136         | 1.18E-101 | 279       | 100        |
| 2f0eA     | 1EY0A        | 99.259     | 135              | 1           | 135       | 2             | 136         | 1.13E-100 | 276       | 100        |

| Query* ID | Subject * ID | % Identity | Alignment Length | Query start         | Query end | Subject start | Subject end | E value   | Bit score | % Coverage |
|-----------|--------------|------------|------------------|---------------------|-----------|---------------|-------------|-----------|-----------|------------|
| 2f0fA     | 1EY0A        | 99.265     | 136              | 1                   | 136       | 1             | 136         | 1.58E-101 | 279       | 100        |
| 2f0gA     | 1EY0A        | 99.259     | 135              | 1                   | 135       | 2             | 136         | 5.54E-101 | 277       | 100        |
| 2f0hA     | 1EY0A        | 99.259     | 135              | 1                   | 135       | 2             | 136         | 1.13E-100 | 276       | 100        |
| 2f0iA     | 1EY0A        | 99.265     | 136              | 1                   | 136       | 1             | 136         | 2.37E-101 | 278       | 100        |
| 2f0jA     | 1EY0A        | 99.259     | 135              | 1                   | 135       | 2             | 136         | 6.53E-101 | 277       | 100        |
| 2heaA     | 1LZ1A        | 99.231     | 130              | 1                   | 130       | 1             | 130         | 1.01E-96  | 266       | 100        |
| 2hebA     | 1LZ1A        | 99.231     | 130              | 1                   | 130       | 1             | 130         | 1.01E-96  | 266       | 100        |
| 2hecA     | 1LZ1A        | 99.231     | 130              | 1                   | 130       | 1             | 130         | 1.01E-96  | 266       | 100        |
| 2hedA     | 1LZ1A        | 99.231     | 130              | 1                   | 130       | 1             | 130         | 1.01E-96  | 266       | 100        |
| 2hecA     | 1LZ1A        | 99.231     | 130              | 1                   | 130       | 1             | 130         | 2.54E-96  | 265       | 100        |
| 2hefA     | 1LZ1A        | 99.231     | 130              | 1                   | 130       | 1             | 130         | 1.01E-96  | 266       | 100        |
| 2l78A     | 2LZMA        | 98.148     | 162              | 1                   | 162       | 1             | 162         | 4.74E-121 | 330       | 100        |
| 2snmA     | 1EY0A        | 99.259     | 135              | 1                   | 135       | 2             | 136         | 5.31E-100 | 275       | 100        |
| 3aa2A     | 2RN2A        | 99.346     | 153              | 1                   | 153       | 3             | 155         | 4.42E-117 | 319       | 100        |
| 3aa3A     | 2RN2A        | 99.355     | 155              | 1                   | 155       | 1             | 155         | 9.75E-119 | 324       | 100        |
| 3aa4A     | 2RN2A        | 99.342     | 152              | 1                   | 152       | 2             | 153         | 1.48E-116 | 318       | 100        |
| 3aa5X     | 2RN2A        | 99.346     | 153              | 1                   | 153       | 2             | 154         | 4.67E-117 | 319       | 100        |
| 3c7wA     | 2LZMA        | 99.39      | 164              | 1                   | 164       | 1             | 164         | 1.26E-124 | 339       | 100        |
| 3c7yA     | 2LZMA        | 99.39      | 164              | 1                   | 164       | 1             | 164         | 5.58E-124 | 338       | 100        |
| 3c80A     | 2LZMA        | 99.383     | 162              | 1                   | 162       | 1             | 162         | 1.61E-122 | 334       | 100        |
| 3c81A     | 2LZMA        | 99.39      | 164              | 1                   | 164       | 1             | 164         | 3.76E-124 | 338       | 100        |
| 3c83A     | 2LZMA        | 99.39      | 164              | 1                   | 164       | 1             | 164         | 6.88E-124 | 337       | 100        |
| 3c8qA     | 2LZMA        | 99.39      | 164              | 1                   | 164       | 1             | 164         | 6.80E-124 | 337       | 100        |
| 3c8rA     | 2LZMA        | 99.39      | 164              | 1                   | 164       | 1             | 164         | 9.77E-124 | 337       | 100        |
| 3c8sA     | 2LZMA        | 99.39      | 164              | 1                   | 164       | 1             | 164         | 3.37E-124 | 338       | 100        |
| 3cdoA     | 2LZMA        | 99.383     | 162              | 1                   | 162       | 1             | 162         | 1.53E-122 | 334       | 100        |
| 3cdqA     | 2LZMA        | 99.39      | 164              | 1                   | 164       | 1             | 164         | 3.19E-124 | 338       | 100        |
| 3cdrA     | 2LZMA        | 99.39      | 164              | 1                   | 164       | 1             | 164         | 1.97E-124 | 339       | 100        |
| 3cdtA     | 2LZMA        | 99.39      | 164              | 1                   | 164       | 1             | 164         | 4.15E-124 | 338       | 100        |
| 3cdvA     | 2LZMA        | 99.39      | 164              | 1                   | 164       | 1             | 164         | 4.74E-124 | 338       | 100        |
| 3f8vA     | 2LZMA        | 99.39      | 164              | 1                   | 164       | 1             | 164         | 2.92E-124 | 338       | 100        |
| 3fi5A     | 2LZMA        | 99.39      | 164              | 1                   | 164       | 1             | 164         | 1.52E-123 | 337       | 100        |
| 3nvvA     |              |            |                  | No significant hits |           |               |             |           |           |            |
| 4d6bA     | 1HMSA        | 62.791     | 129              | 4                   | 132       | 2             | 130         | 6.16E-60  | 173       | 97         |

| Query* ID | Subject * ID        | % Identity | Alignment Length | Query start | Query end | Subject start | Subject end | E value  | Bit score | % Coverage |
|-----------|---------------------|------------|------------------|-------------|-----------|---------------|-------------|----------|-----------|------------|
| 5eaaA     | 1AMQA               | 99.747     | 396              | 1           | 396       | 1             | 396         | 0        | 820       | 100        |
| 5n4mA     | 1HMSA               | 62.791     | 129              | 4           | 132       | 2             | 130         | 1.58E-60 | 175       | 97         |
| 5n4pA     | 1HMSA               | 63.566     | 129              | 4           | 132       | 2             | 130         | 4.16E-61 | 176       | 97         |
| 5n4qA     | 1HMSA               | 62.791     | 129              | 4           | 132       | 2             | 130         | 6.04E-61 | 176       | 97         |
| 5o10A     | No significant hits |            |                  |             |           |               |             |          |           |            |
| 6ew5A     | 1HMSA               | 62.791     | 129              | 4           | 132       | 2             | 130         | 1.85E-60 | 174       | 97         |
| 8ptiA     | 5PTIA               | 98.276     | 58               | 1           | 58        | 1             | 58          | 3.59E-40 | 117       | 100        |

\*Query ID: PDB ID + Chain ID for proteins in the Ssym+ reverse dataset

\*Subject ID: PDB ID + Chain ID for best hit in the S2298 dataset
